# Supplementary material for: Drivers of benthic metacommunity structure along tropical estuaries
Source: PubMed Central journal article supplement (PMC6997391; doi:10.1038/s41598-020-58631-1), 2020-02-03
Supplement: 41598_2020_58631_MOESM1_ESM.pdf [file 41598_2020_58631_MOESM1_ESM.pdf]

## **Electronic Supplementary Material**

### **Drivers of benthic metacommunity structure along tropical estuaries**

Andreia Teixeira Alves<sup>1\*</sup>, Danielle Katharine Petsch<sup>2</sup>, Francisco Barros<sup>1</sup>

\*Corresponding author e-mail address: [dea\\_alves106@yahoo.com.br](mailto:dea_alves106@yahoo.com.br) ; Telephone: +55 71991542200

1. Laboratório de Ecologia Bentônica (LEB), Instituto de Biologia, Programa de Pós Graduação em Ecologia e Biomonitoramento, Universidade Federal da Bahia, Brazil

2. Núcleo de Pesquisas em Limnologia, Ictiologia e Aquicultura (Nupelia), Programa de Pós-Graduação em Ecologia de Ambientes Aquáticos Continentais (PEA), Universidade Estadual de Maringá, Brazil

**Supplementary Figure 1** Sample-based rarefaction curves showing the relationship between sample effort (i.e., number of stations) and family richness for each estuarine system for the total sampling time

**Supplementary Figure 2** Schematic representation used to examine how the EMS (i.e., coherence, turnover and boundary clumping) results in six main metacommunity structures (i.e., checkerboards, random, nested, evenly spaced, Gleasonian and Clementsian) and quasi-structures. Modified from Presley et al. (2010) and Brasil et al. (2017) for a) Subaé, b) Jaguaripe, and c) Paraguaçu; n= number of times the pattern was found

**Supplementary Table 1** “Nestedness metric based on overlap and decreasing fill” (NODF) results and the significance values for each estuarine system

**Supplementary Table 2** Variance inflation factor (VIF) values and the environmental predictors resulted from multicollinearity test for each system

**Supplementary Table 3** Variation partitioning result for each estuarine system and the significance of environmental, spatial and temporal components individually

# Supplementary Figure 1

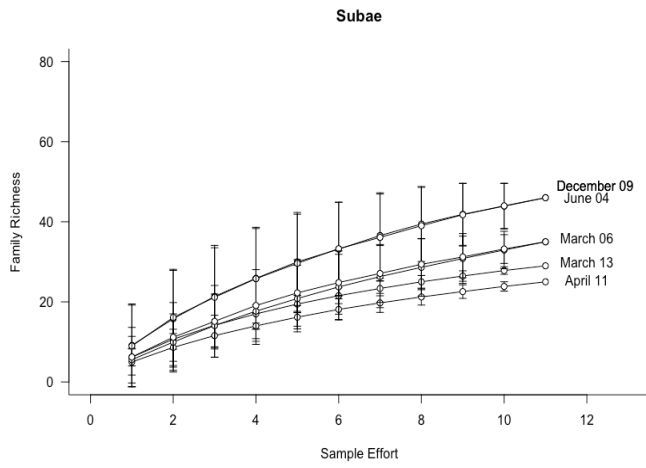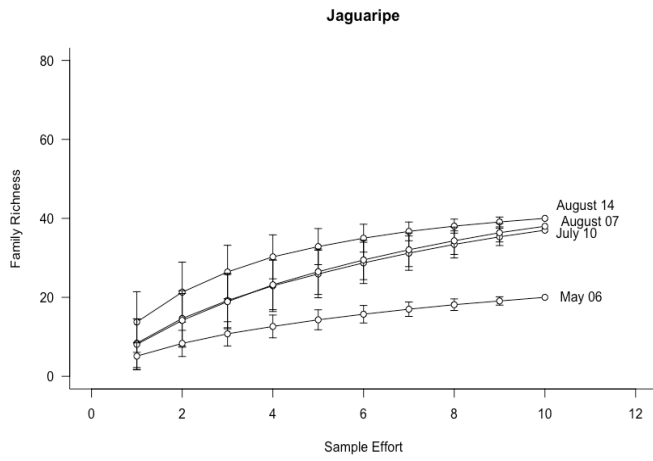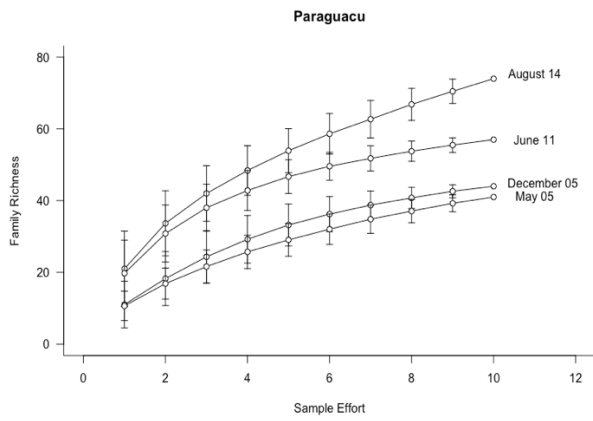

Supplementary Figure 2

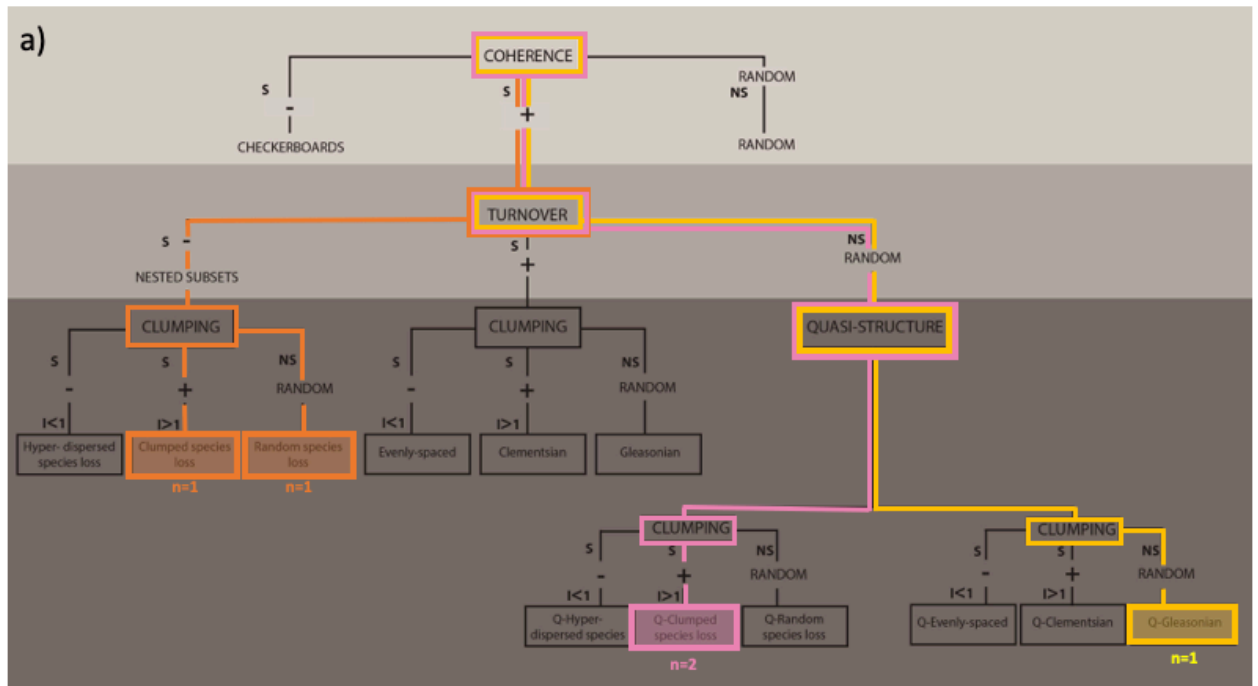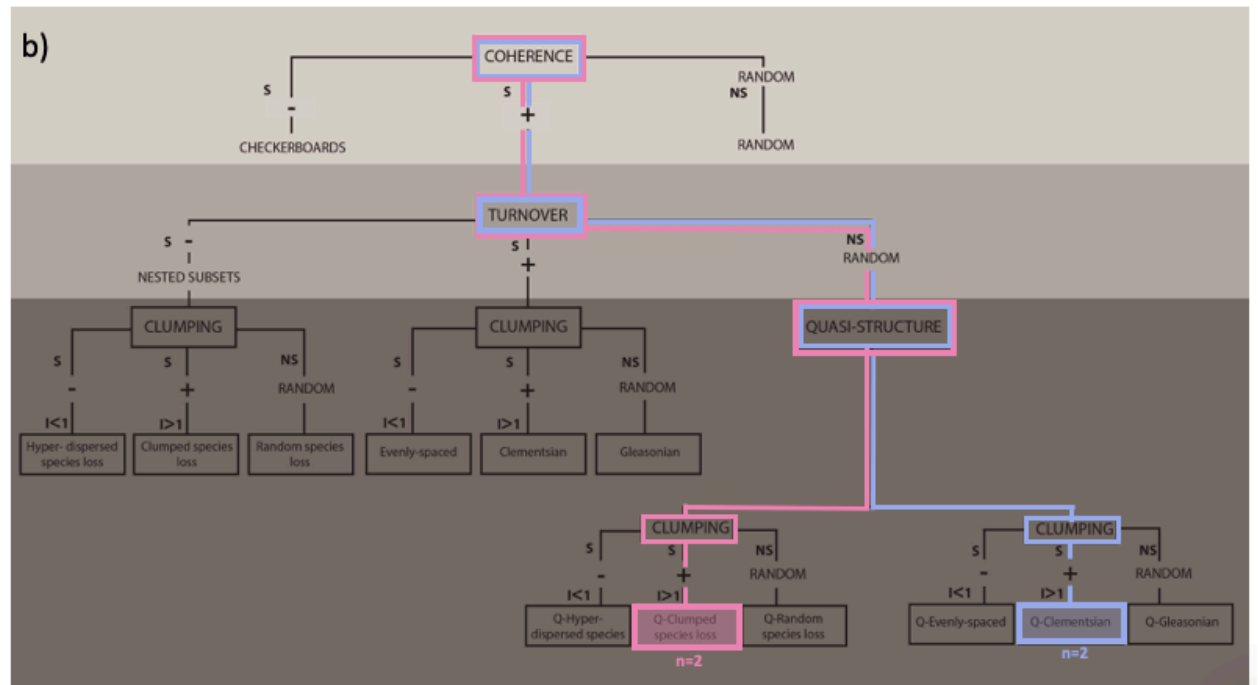

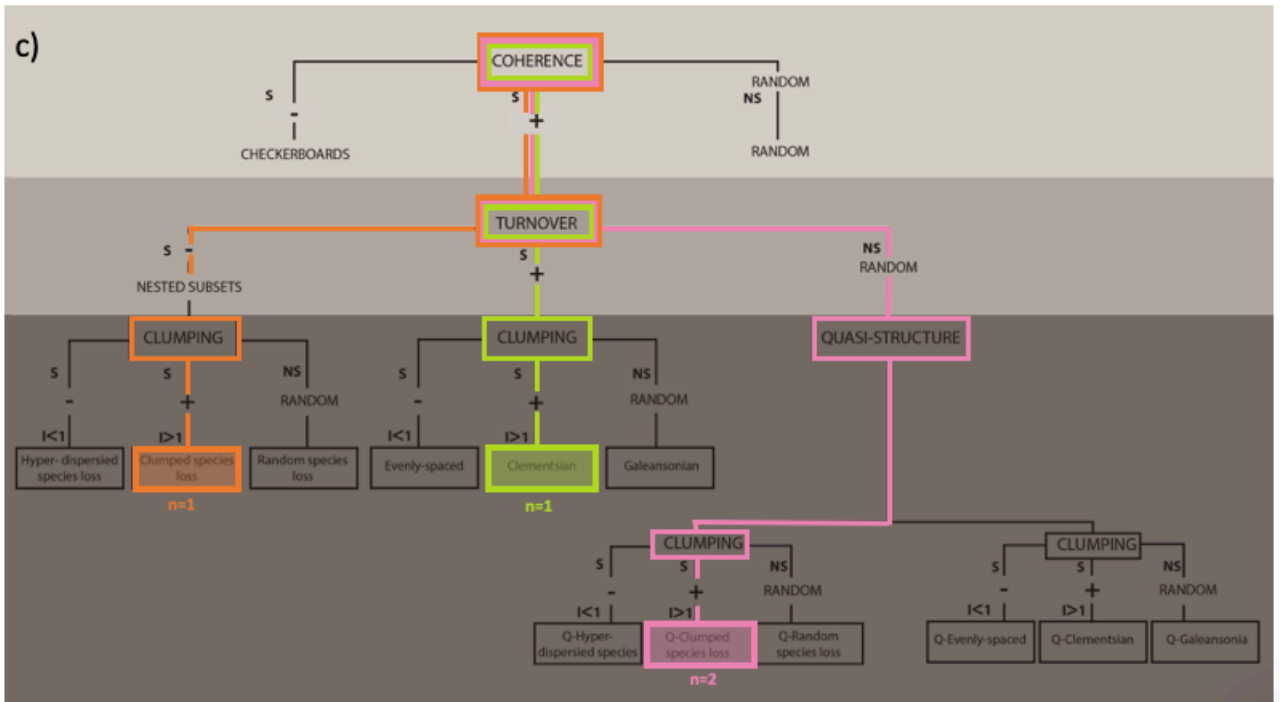

**Supplementary Table 1** We performed “Nestedness metric based on overlap and decreasing fill” NODF. Prior to NODF, we generated a matrix of incidence (presence/absence of species for each sampling period and each estuary) by ordering sites into rows following salinity gradient (i.e., sites from sea to freshwater) and species occurrence into columns. We calculated NODF again as explained above, but pooling all samplings periods for each site in each estuary. (NODF) values among rows (Nrows), matrix fill and associated *P* values for each sampling period of Subaé, Jaguaripe and Paraguaçu estuaries. Significant *P* values are indicated by bold font

| Estuary   | Month | Year | Nrows | Matrix fill | <i>P</i>     |
|-----------|-------|------|-------|-------------|--------------|
| Subaé     | 03    | 2013 | 20.82 | 0.050       | <b>0.001</b> |
| Subaé     | 04    | 2011 | 44.83 | 0.041       | <b>0.001</b> |
| Subaé     | 12    | 2009 | 36.39 | 0.069       | <b>0.001</b> |
| Subaé     | 03    | 2006 | 28.10 | 0.045       | <b>0.001</b> |
| Subaé     | 06    | 2004 | 55.44 | 0.049       | <b>0.001</b> |
| Jaguaripe | 08    | 2014 | 52.15 | 0.104       | <b>0.001</b> |
| Jaguaripe | 07    | 2010 | 44.92 | 0.066       | <b>0.001</b> |
| Jaguaripe | 08    | 2007 | 59.00 | 0.064       | <b>0.001</b> |
| Jaguaripe | 05    | 2006 | 63.48 | 0.041       | <b>0.001</b> |
| Paraguaçu | 08    | 2014 | 30.72 | 0.151       | <b>0.001</b> |
| Paraguaçu | 06    | 2011 | 37.76 | 0.146       | <b>0.001</b> |
| Paraguaçu | 12    | 2005 | 37.83 | 0.083       | <b>0.001</b> |
| Paraguaçu | 05    | 2005 | 41.89 | 0.081       | <b>0.001</b> |

(NODF) values among rows (Nrows), matrix fill and associated *P* values pooling all sampling periods for Subaé, Jaguaripe and Paraguaçu estuaries. Significant *P* values are indicated by bold font

| Estuary   | Nrows | Matrix fill | <i>P</i>     |
|-----------|-------|-------------|--------------|
| Subaé     | 48.22 | 0.140       | <b>0.001</b> |
| Jaguaripe | 40.25 | 0.276       | <b>0.001</b> |
| Paraguaçu | 60.94 | 0.147       | <b>0.001</b> |

**Supplementary Table 2** Variance inflation factor (VIF) values and the remaining environmental predictors resulted from multicollinearity test after the removal of collinear explanatory variables characterized by with highest value (VIF >3) for each system

| Estuarine system | Environmental predictors | Variance inflation factor |
|------------------|--------------------------|---------------------------|
| Subaé            | Pebble                   | 1.39                      |
|                  | Very coarse sand         | 1.67                      |
|                  | Medium sand              | 1.81                      |
|                  | Fine sand                | 1.29                      |
|                  | Very fine sand           | 1.61                      |
|                  | Salinity                 | 1.72                      |
| Jaguaripe        | Pebble                   | 1.87                      |
|                  | Granule gravel           | 2.05                      |
|                  | Coarse sand              | 1.92                      |
|                  | Medium sand              | 1.50                      |
|                  | Very fine sand           | 1.47                      |
|                  | Salinity                 | 1.70                      |
| Paraguaçu        | Pebble                   | 1.55                      |
|                  | Very coarse sand         | 1.59                      |
|                  | Medium sand              | 1.69                      |
|                  | Fine sand                | 1.78                      |
|                  | Very fine sand           | 1.69                      |
|                  | Salinity                 | 2.21                      |

**Supplementary Table 3** Variation partitioning results showing the contribution of environmental variables [X1], spatial factors [X2] and temporal components [X3] to total variation of benthic assemblages for Subaé, Jaguaripe and Paraguaçu estuaries over time. The component [a] represents the purely environmental fraction, [b] purely spatial, [c] purely temporal, [d] shared environmental and spatial, [e] shared spatial and temporal, [f] shared environmental and temporal, [g] shared environmental, spatial and temporal components. Variance partitioning (%) and associated *P* values of the purely environmental, spatial and temporal components for each estuarine system

**Subaé**

| <b>Component</b>             | <b>R<sup>2</sup></b> | <b>Adj.R<sup>2</sup></b> |
|------------------------------|----------------------|--------------------------|
| [a+d+f+g] = X1               | 0.20                 | 0.13                     |
| [b+d+e+g] = X2               | 0.23                 | 0.17                     |
| [c+e+f+g] = X3               | 0.10                 | 0.03                     |
| [a+b+d+e+f+g] = X1+X2        | 0.32                 | 0.20                     |
| [a+c+d+e+f+g] = X1+X3        | 0.29                 | 0.17                     |
| [b+c+d+e+f+g] = X2+X3        | 0.33                 | 0.21                     |
| [a+b+c+d+e+f+g] = All        | 0.40                 | 0.23                     |
| <b>Individual fractions</b>  |                      |                          |
| [a] = X1   X2+X3             | 0.02                 |                          |
| [b] = X2   X1+X3             | 0.06                 |                          |
| [c] = X3   X1+X2             | 0.03                 |                          |
| [d]                          | 0.12                 |                          |
| [e]                          | 0.10                 |                          |
| [f]                          | 0.01                 |                          |
| [g]                          | -0.03                |                          |
| [h] = Residuals              | 0.78                 |                          |
| <b>Controlling 1 table X</b> |                      |                          |
| [a+d] = X1   X3              | 0.15                 |                          |
| [a+f] = X1   X2              | 0.03                 |                          |
| [b+d] = X2   X3              | 0.19                 |                          |
| [b+e] = X2   X1              | 0.07                 |                          |
| [c+e] = X3   X1              | 0.04                 |                          |
| [c+f] = X3   X2              | 0.04                 |                          |

**Purely environmental**

| Number of permutations: |    | 999      |      |          |
|-------------------------|----|----------|------|----------|
|                         | Df | Variance | F    | <i>P</i> |
| Model                   | 4  | 0.07     | 1.57 | 0.003    |
| Residual                | 45 | 0.50     |      |          |

**Purely spatial**

|                         |  |     |  |  |
|-------------------------|--|-----|--|--|
| Number of permutations: |  | 999 |  |  |
|-------------------------|--|-----|--|--|

|          | Df | Variance | F    | P     |
|----------|----|----------|------|-------|
| Model    | 4  | 0.09     | 2.03 | 0.001 |
| Residual | 45 | 0.51     |      |       |

### Purely temporal

| Number of permutations: |    | 999      |      |       |
|-------------------------|----|----------|------|-------|
|                         | Df | Variance | F    | P     |
| Model                   | 1  | 0.02     | 1.98 | 0.012 |
| Residual                | 45 | 0.50     |      |       |

### Jaguaripe

| Component                    | R <sup>2</sup> | Adj.R <sup>2</sup> |
|------------------------------|----------------|--------------------|
| [a+d+f+g] = X1               | 0.33           | 0.25               |
| [b+d+e+g] = X2               | 0.35           | 0.32               |
| [c+e+f+g] = X3               | 0.14           | 0.07               |
| [a+b+d+e+f+g] = X1+X2        | 0.48           | 0.38               |
| [a+c+d+e+f+g] = X1+X3        | 0.47           | 0.35               |
| [b+c+d+e+f+g] = X2+X3        | 0.49           | 0.41               |
| [a+b+c+d+e+f+g] = All        | 0.58           | 0.45               |
| <b>Individual fractions</b>  |                |                    |
| [a] = X1   X2+X3             | 0.04           |                    |
| [b] = X2   X1+X3             | 0.10           |                    |
| [c] = X3   X1+X2             | 0.08           |                    |
| [d]                          | 0.25           |                    |
| [e]                          | 0.03           |                    |
| [f]                          | 0.02           |                    |
| [g]                          | -0.06          |                    |
| [h] = Residuals              | 0.55           |                    |
| <b>Controlling 1 table X</b> |                |                    |
| [a+d] = X1   X3              | 0.29           |                    |
| [a+f] = X1   X2              | 0.06           |                    |
| [b+d] = X2   X3              | 0.35           |                    |
| [b+e] = X2   X1              | 0.13           |                    |
| [c+e] = X3   X1              | 0.10           |                    |
| [c+f] = X3   X2              | 0.10           |                    |

### Purely environmental

| Number of permutations: |    | 999      |      |       |
|-------------------------|----|----------|------|-------|
|                         | Df | Variance | F    | P     |
| Model                   | 4  | 0.07     | 1.57 | 0.017 |
| Residual                | 32 | 0.33     |      |       |

### Purely spatial

|                         |  |     |  |  |
|-------------------------|--|-----|--|--|
| Number of permutations: |  | 999 |  |  |
|-------------------------|--|-----|--|--|



|          | Df | Variance | F    | P     |
|----------|----|----------|------|-------|
| Model    | 2  | 0.09     | 4.29 | 0.001 |
| Residual | 32 | 0.33     |      |       |

### Purely temporal

| Number of permutations: |    | 999      |      |       |
|-------------------------|----|----------|------|-------|
|                         | Df | Variance | F    | P     |
| Model                   | 1  | 0.04     | 3.37 | 0.001 |
| Residual                | 32 | 0.33     |      |       |

### Paraguaçu

| Component                    | R <sup>2</sup> | Adj.R <sup>2</sup> |
|------------------------------|----------------|--------------------|
| [a+d+f+g] = X1               | 0.14           | 0.10               |
| [b+d+e+g] = X2               | 0.19           | 0.12               |
| [c+e+f+g] = X3               | 0.19           | 0.12               |
| [a+b+d+e+f+g] = X1+X2        | 0.28           | 0.17               |
| [a+c+d+e+f+g] = X1+X3        | 0.35           | 0.25               |
| [b+c+d+e+f+g] = X2+X3        | 0.38           | 0.27               |
| [a+b+c+d+e+f+g] = All        | 0.44           | 0.30               |
| <b>Individual fractions</b>  |                |                    |
| [a] = X1   X2+X3             | 0.03           |                    |
| [b] = X2   X1+X3             | 0.05           |                    |
| [c] = X3   X1+X2             | 0.13           |                    |
| [d]                          | 0.01           |                    |
| [e]                          | 0.03           |                    |
| [f]                          | 0.02           |                    |
| [g]                          | -0.05          |                    |
| [h] = Residuals              | 0.70           |                    |
| <b>Controlling 1 table X</b> |                |                    |
| [a+d] = X1   X3              | 0.13           |                    |
| [a+f] = X1   X2              | 0.05           |                    |
| [b+d] = X2   X3              | 0.14           |                    |
| [b+e] = X2   X1              | 0.08           |                    |
| [c+e] = X3   X1              | 0.16           |                    |
| [c+f] = X3   X2              | 0.15           |                    |

### Purely environmental

| Number of permutations: |    | 999      |      |       |
|-------------------------|----|----------|------|-------|
|                         | Df | Variance | F    | P     |
| Model                   | 3  | 0.05     | 1.75 | 0.001 |
| Residual                | 33 | 0.43     |      |       |

### Purely spatial

|                         |  |     |  |  |
|-------------------------|--|-----|--|--|
| Number of permutations: |  | 999 |  |  |
|-------------------------|--|-----|--|--|

---

|          | Df | Variance | F    | <i>P</i> |
|----------|----|----------|------|----------|
| Model    | 3  | 0.08     | 1.99 | 0.001    |
| Residual | 33 | 0.43     |      |          |

---

**Purely temporal**

---

| Number of permutations: | 999 |          |      |          |
|-------------------------|-----|----------|------|----------|
|                         | Df  | Variance | F    | <i>P</i> |
| Model                   | 1   | 0.06     | 4.75 | 0.001    |
| Residual                | 32  | 0.43     |      |          |

---
