# Supplementary material for: Drivers of benthic metacommunity structure along tropical estuaries
Source: PubMed Central journal article supplement (PMC6997391; doi:10.1038/s41598-020-58631-1), 2020-02-03
Supplement: 41598_2020_58631_MOESM2_ESM.pdf [file 41598_2020_58631_MOESM2_ESM.pdf]

## Drivers of benthic metacommunity structure along tropical estuaries

Andreia Teixeira Alves<sup>1\*</sup>, Danielle Katharine Petsch<sup>2</sup>, Francisco Barros<sup>1</sup>

\*Corresponding author e-mail address: [dea\\_alves106@yahoo.com.br](mailto:dea_alves106@yahoo.com.br) ; Telephone: +55 71991542200 1.

1. Laboratório de Ecologia Bentônica (LEB), Instituto de Biologia, Programa de Pós Graduação em Ecologia e Biomonitoramento, Universidade Federal da Bahia, Brazil

2. Núcleo de Pesquisas em Limnologia, Ictiologia e Aquicultura (Nupelia), Programa de Pós- Graduação em Ecologia de Ambientes Aquáticos Continentais (PEA), Universidade Estadual de Maringá, Brazil

### Supplementary Dataset Species Data

| Estuary | Month    | Year | Sites | Arabellidae |
|---------|----------|------|-------|-------------|
| Subaé   | March    | 2013 | #1    | 0           |
| Subaé   | March    | 2013 | #2    | 0           |
| Subaé   | March    | 2013 | #3    | 0           |
| Subaé   | March    | 2013 | #4    | 0           |
| Subaé   | March    | 2013 | #5    | 0           |
| Subaé   | March    | 2013 | #6    | 0           |
| Subaé   | March    | 2013 | #7    | 0           |
| Subaé   | March    | 2013 | #8    | 0           |
| Subaé   | March    | 2013 | #9    | 0           |
| Subaé   | March    | 2013 | #10   | 0           |
| Subaé   | March    | 2013 | #11   | 0           |
| Subaé   | April    | 2011 | #1    | 0           |
| Subaé   | April    | 2011 | #2    | 0           |
| Subaé   | April    | 2011 | #3    | 0           |
| Subaé   | April    | 2011 | #4    | 0           |
| Subaé   | April    | 2011 | #5    | 0           |
| Subaé   | April    | 2011 | #6    | 0           |
| Subaé   | April    | 2011 | #7    | 0           |
| Subaé   | April    | 2011 | #8    | 0           |
| Subaé   | April    | 2011 | #9    | 0           |
| Subaé   | April    | 2011 | #10   | 0           |
| Subaé   | April    | 2011 | #11   | 0           |
| Subaé   | December | 2009 | #1    | 0           |
| Subaé   | December | 2009 | #2    | 0           |
| Subaé   | December | 2009 | #3    | 0           |
| Subaé   | December | 2009 | #4    | 0           |
| Subaé   | December | 2009 | #5    | 0           |
| Subaé   | December | 2009 | #6    | 0           |
| Subaé   | December | 2009 | #7    | 0           |

|           |          |      |     |   |
|-----------|----------|------|-----|---|
| Subaé     | December | 2009 | #8  | 0 |
| Subaé     | December | 2009 | #9  | 0 |
| Subaé     | December | 2009 | #10 | 0 |
| Subaé     | December | 2009 | #11 | 0 |
| Subaé     | March    | 2006 | #1  | 0 |
| Subaé     | March    | 2006 | #2  | 1 |
| Subaé     | March    | 2006 | #3  | 0 |
| Subaé     | March    | 2006 | #4  | 0 |
| Subaé     | March    | 2006 | #5  | 0 |
| Subaé     | March    | 2006 | #6  | 0 |
| Subaé     | March    | 2006 | #7  | 0 |
| Subaé     | March    | 2006 | #8  | 0 |
| Subaé     | March    | 2006 | #9  | 0 |
| Subaé     | March    | 2006 | #10 | 0 |
| Subaé     | March    | 2006 | #11 | 0 |
| Subaé     | June     | 2004 | #1  | 0 |
| Subaé     | June     | 2004 | #2  | 0 |
| Subaé     | June     | 2004 | #3  | 0 |
| Subaé     | June     | 2004 | #4  | 0 |
| Subaé     | June     | 2004 | #5  | 0 |
| Subaé     | June     | 2004 | #6  | 0 |
| Subaé     | June     | 2004 | #7  | 0 |
| Subaé     | June     | 2004 | #8  | 0 |
| Subaé     | June     | 2004 | #9  | 0 |
| Subaé     | June     | 2004 | #10 | 0 |
| Subaé     | June     | 2004 | #11 | 0 |
| Jaguaripe | August   | 2014 | #1  | 0 |
| Jaguaripe | August   | 2014 | #2  | 0 |
| Jaguaripe | August   | 2014 | #3  | 0 |
| Jaguaripe | August   | 2014 | #4  | 0 |
| Jaguaripe | August   | 2014 | #5  | 0 |
| Jaguaripe | August   | 2014 | #6  | 0 |
| Jaguaripe | August   | 2014 | #7  | 0 |
| Jaguaripe | August   | 2014 | #8  | 0 |
| Jaguaripe | August   | 2014 | #9  | 0 |
| Jaguaripe | August   | 2014 | #10 | 0 |
| Jaguaripe | August   | 2010 | #1  | 0 |
| Jaguaripe | August   | 2010 | #2  | 0 |
| Jaguaripe | August   | 2010 | #3  | 0 |
| Jaguaripe | August   | 2010 | #4  | 0 |
| Jaguaripe | August   | 2010 | #5  | 0 |
| Jaguaripe | August   | 2010 | #6  | 0 |
| Jaguaripe | August   | 2010 | #7  | 0 |

|           |        |      |     |   |
|-----------|--------|------|-----|---|
| Jaguaripe | August | 2010 | #8  | 0 |
| Jaguaripe | August | 2010 | #9  | 0 |
| Jaguaripe | August | 2010 | #10 | 0 |
| Jaguaripe | August | 2007 | #1  | 0 |
| Jaguaripe | August | 2007 | #2  | 0 |
| Jaguaripe | August | 2007 | #3  | 0 |
| Jaguaripe | August | 2007 | #4  | 0 |
| Jaguaripe | August | 2007 | #5  | 0 |
| Jaguaripe | August | 2007 | #6  | 0 |
| Jaguaripe | August | 2007 | #7  | 0 |
| Jaguaripe | August | 2007 | #8  | 0 |
| Jaguaripe | August | 2007 | #9  | 0 |
| Jaguaripe | August | 2007 | #10 | 0 |
| Jaguaripe | May    | 2006 | #1  | 0 |
| Jaguaripe | May    | 2006 | #2  | 0 |
| Jaguaripe | May    | 2006 | #3  | 0 |
| Jaguaripe | May    | 2006 | #4  | 0 |
| Jaguaripe | May    | 2006 | #5  | 0 |
| Jaguaripe | May    | 2006 | #6  | 0 |
| Jaguaripe | May    | 2006 | #7  | 0 |
| Jaguaripe | May    | 2006 | #8  | 0 |
| Jaguaripe | May    | 2006 | #9  | 0 |
| Jaguaripe | May    | 2006 | #10 | 0 |
| Paraguaçu | August | 2014 | #1  | 0 |
| Paraguaçu | August | 2014 | #2  | 0 |
| Paraguaçu | August | 2014 | #3  | 0 |
| Paraguaçu | August | 2014 | #4  | 0 |
| Paraguaçu | August | 2014 | #5  | 0 |
| Paraguaçu | August | 2014 | #6  | 0 |
| Paraguaçu | August | 2014 | #7  | 0 |
| Paraguaçu | August | 2014 | #8  | 0 |
| Paraguaçu | August | 2014 | #9  | 0 |
| Paraguaçu | August | 2014 | #10 | 0 |
| Paraguaçu | June   | 2011 | #1  | 0 |
| Paraguaçu | June   | 2011 | #2  | 0 |
| Paraguaçu | June   | 2011 | #3  | 0 |
| Paraguaçu | June   | 2011 | #4  | 0 |
| Paraguaçu | June   | 2011 | #5  | 0 |
| Paraguaçu | June   | 2011 | #6  | 0 |
| Paraguaçu | June   | 2011 | #7  | 0 |
| Paraguaçu | June   | 2011 | #8  | 0 |
| Paraguaçu | June   | 2011 | #9  | 0 |
| Paraguaçu | June   | 2011 | #10 | 0 |





|   |   |   |   |   |
|---|---|---|---|---|
| 1 | 1 | 0 | 0 | 0 |
| 1 | 0 | 1 | 0 | 1 |
| 0 | 0 | 1 | 0 | 1 |
| 0 | 0 | 0 | 0 | 1 |
| 0 | 0 | 1 | 0 | 1 |
| 0 | 0 | 0 | 0 | 0 |
| 0 | 0 | 0 | 0 | 0 |
| 0 | 0 | 0 | 0 | 0 |
| 0 | 0 | 0 | 0 | 0 |
| 0 | 0 | 0 | 0 | 0 |
| 1 | 1 | 0 | 0 | 1 |
| 1 | 1 | 1 | 0 | 1 |
| 1 | 0 | 1 | 0 | 1 |
| 1 | 1 | 0 | 0 | 1 |
| 0 | 1 | 0 | 0 | 1 |
| 0 | 1 | 0 | 0 | 0 |
| 0 | 0 | 0 | 0 | 0 |
| 0 | 0 | 0 | 0 | 0 |
| 0 | 0 | 0 | 0 | 0 |
| 0 | 0 | 0 | 0 | 0 |
| 1 | 0 | 0 | 0 | 1 |
| 1 | 1 | 0 | 0 | 1 |
| 1 | 1 | 0 | 0 | 1 |
| 0 | 0 | 1 | 0 | 1 |
| 0 | 0 | 0 | 0 | 1 |
| 0 | 1 | 0 | 0 | 1 |
| 0 | 0 | 1 | 0 | 0 |
| 0 | 0 | 0 | 0 | 0 |
| 0 | 0 | 0 | 0 | 0 |
| 0 | 0 | 0 | 0 | 0 |
| 0 | 0 | 0 | 0 | 0 |
| 1 | 1 | 0 | 0 | 1 |
| 1 | 0 | 1 | 0 | 1 |
| 1 | 1 | 0 | 0 | 0 |
| 1 | 1 | 1 | 0 | 1 |
| 1 | 1 | 1 | 0 | 1 |
| 0 | 1 | 1 | 0 | 1 |
| 0 | 1 | 1 | 0 | 1 |
| 0 | 1 | 0 | 0 | 0 |
| 0 | 1 | 1 | 0 | 0 |
| 1 | 0 | 1 | 0 | 0 |
| 1 | 1 | 1 | 0 | 1 |
| 1 | 1 | 0 | 0 | 0 |

|                   |                   |                   |                         |                  |
|-------------------|-------------------|-------------------|-------------------------|------------------|
| 1                 | 1                 | 0                 | 0                       | 0                |
| 1                 | 1                 | 0                 | 0                       | 1                |
| 1                 | 1                 | 0                 | 0                       | 1                |
| 1                 | 1                 | 1                 | 0                       | 1                |
| 0                 | 1                 | 0                 | 0                       | 0                |
| 0                 | 1                 | 0                 | 0                       | 0                |
| 0                 | 0                 | 0                 | 0                       | 0                |
| 1                 | 0                 | 0                 | 0                       | 0                |
| 1                 | 1                 | 0                 | 0                       | 0                |
| 1                 | 0                 | 0                 | 0                       | 0                |
| 0                 | 0                 | 0                 | 0                       | 0                |
| 1                 | 0                 | 0                 | 0                       | 0                |
| 1                 | 0                 | 0                 | 0                       | 0                |
| 0                 | 1                 | 0                 | 0                       | 0                |
| 0                 | 0                 | 0                 | 0                       | 0                |
| 0                 | 0                 | 0                 | 0                       | 0                |
| 1                 | 0                 | 0                 | 0                       | 0                |
| 1                 | 1                 | 0                 | 0                       | 0                |
| 1                 | 0                 | 0                 | 0                       | 0                |
| 0                 | 1                 | 0                 | 0                       | 0                |
| 1                 | 1                 | 0                 | 0                       | 0                |
| 0                 | 1                 | 0                 | 0                       | 0                |
| 0                 | 1                 | 0                 | 0                       | 0                |
| 0                 | 1                 | 0                 | 0                       | 0                |
| 0                 | 1                 | 0                 | 0                       | 0                |
| <b>Nereididae</b> | <b>Orbiniidae</b> | <b>Pilargidae</b> | <b>Poecilochaetidae</b> | <b>Spionidae</b> |
| 0                 | 0                 | 0                 | 0                       | 0                |
| 0                 | 0                 | 0                 | 0                       | 0                |
| 1                 | 0                 | 0                 | 0                       | 0                |
| 1                 | 0                 | 0                 | 0                       | 0                |
| 1                 | 0                 | 0                 | 0                       | 0                |
| 1                 | 0                 | 0                 | 0                       | 0                |
| 0                 | 1                 | 1                 | 0                       | 0                |
| 0                 | 1                 | 1                 | 0                       | 1                |
| 1                 | 0                 | 1                 | 0                       | 0                |
| 1                 | 0                 | 1                 | 0                       | 1                |
| 1                 | 0                 | 0                 | 0                       | 0                |
| 0                 | 1                 | 0                 | 0                       | 0                |
| 0                 | 1                 | 0                 | 0                       | 0                |
| 1                 | 1                 | 1                 | 0                       | 0                |
| 1                 | 1                 | 1                 | 0                       | 0                |

|   |   |   |   |   |
|---|---|---|---|---|
| 0 | 1 | 0 | 0 | 1 |
| 0 | 1 | 1 | 0 | 0 |
| 0 | 1 | 1 | 0 | 0 |
| 0 | 0 | 0 | 0 | 0 |
| 0 | 0 | 0 | 0 | 0 |
| 1 | 0 | 0 | 0 | 0 |
| 0 | 0 | 0 | 0 | 0 |
| 0 | 1 | 0 | 0 | 0 |
| 1 | 1 | 0 | 0 | 1 |
| 0 | 0 | 0 | 0 | 0 |
| 0 | 0 | 1 | 0 | 1 |
| 0 | 1 | 0 | 0 | 0 |
| 1 | 1 | 0 | 0 | 0 |
| 1 | 1 | 1 | 0 | 1 |
| 0 | 0 | 1 | 0 | 1 |
| 0 | 0 | 0 | 0 | 0 |
| 1 | 0 | 0 | 0 | 1 |
| 1 | 0 | 0 | 0 | 1 |
| 0 | 1 | 0 | 0 | 1 |
| 0 | 0 | 0 | 0 | 1 |
| 0 | 0 | 0 | 0 | 0 |
| 0 | 1 | 0 | 0 | 0 |
| 0 | 1 | 0 | 0 | 1 |
| 0 | 1 | 0 | 1 | 0 |
| 0 | 1 | 0 | 0 | 0 |
| 0 | 0 | 0 | 0 | 0 |
| 0 | 0 | 0 | 0 | 0 |
| 0 | 1 | 0 | 0 | 0 |
| 0 | 0 | 0 | 0 | 0 |
| 0 | 0 | 0 | 0 | 0 |
| 0 | 1 | 0 | 0 | 0 |
| 0 | 0 | 0 | 0 | 0 |
| 1 | 0 | 0 | 0 | 0 |
| 1 | 0 | 0 | 0 | 0 |
| 0 | 0 | 0 | 0 | 0 |
| 0 | 1 | 0 | 0 | 0 |
| 1 | 1 | 1 | 0 | 1 |
| 1 | 1 | 1 | 1 | 1 |
| 1 | 1 | 1 | 1 | 1 |



|   |   |   |   |   |
|---|---|---|---|---|
| 0 | 0 | 1 | 0 | 1 |
| 0 | 0 | 1 | 0 | 0 |
| 1 | 0 | 1 | 1 | 1 |
| 1 | 0 | 1 | 0 | 1 |
| 1 | 0 | 1 | 0 | 1 |
| 1 | 0 | 0 | 0 | 0 |
| 0 | 1 | 0 | 1 | 1 |
| 1 | 1 | 1 | 1 | 1 |
| 1 | 0 | 0 | 0 | 0 |
| 0 | 0 | 0 | 0 | 0 |
| 0 | 1 | 0 | 0 | 0 |
| 0 | 0 | 0 | 0 | 1 |
| 1 | 0 | 1 | 0 | 0 |
| 1 | 0 | 0 | 1 | 1 |
| 1 | 0 | 0 | 0 | 0 |
| 1 | 0 | 0 | 1 | 0 |
| 0 | 1 | 0 | 0 | 1 |
| 1 | 1 | 0 | 0 | 0 |
| 1 | 1 | 0 | 1 | 0 |
| 0 | 1 | 0 | 0 | 0 |
| 0 | 0 | 1 | 0 | 0 |
| 1 | 0 | 1 | 0 | 1 |
| 1 | 0 | 0 | 0 | 0 |
| 1 | 0 | 0 | 0 | 0 |
| 1 | 0 | 0 | 0 | 0 |
| 0 | 1 | 0 | 0 | 0 |
| 1 | 1 | 0 | 0 | 0 |
| 1 | 1 | 0 | 1 | 0 |
| 0 | 1 | 1 | 1 | 0 |
| 0 | 1 | 0 | 0 | 0 |
| 0 | 1 | 0 | 0 | 0 |
| 0 | 1 | 0 | 0 | 0 |
| 1 | 0 | 1 | 0 | 0 |
| 1 | 0 | 0 | 0 | 0 |
| 0 | 0 | 0 | 0 | 0 |
| 0 | 0 | 0 | 0 | 0 |
| 1 | 1 | 1 | 1 | 1 |
| 1 | 1 | 1 | 0 | 1 |
| 1 | 1 | 0 | 1 | 1 |
| 1 | 1 | 0 | 1 | 1 |
| 1 | 0 | 1 | 1 | 1 |

|                 |                  |                  |                   |                   |
|-----------------|------------------|------------------|-------------------|-------------------|
| 1               | 1                | 1                | 0                 | 1                 |
| 1               | 0                | 1                | 0                 | 1                 |
| 0               | 1                | 0                | 0                 | 0                 |
| 0               | 0                | 1                | 0                 | 1                 |
| 1               | 1                | 0                | 0                 | 1                 |
| 1               | 1                | 1                | 1                 | 1                 |
| 1               | 0                | 1                | 1                 | 1                 |
| 1               | 1                | 0                | 0                 | 1                 |
| 1               | 1                | 0                | 1                 | 1                 |
| 1               | 1                | 1                | 1                 | 1                 |
| 1               | 1                | 1                | 0                 | 1                 |
| 0               | 0                | 0                | 0                 | 1                 |
| 1               | 0                | 0                | 0                 | 1                 |
| 0               | 0                | 0                | 0                 | 1                 |
| 1               | 0                | 1                | 0                 | 0                 |
| 1               | 0                | 0                | 0                 | 0                 |
| 1               | 0                | 0                | 0                 | 0                 |
| 1               | 1                | 0                | 0                 | 1                 |
| 1               | 0                | 0                | 1                 | 0                 |
| 1               | 0                | 0                | 0                 | 0                 |
| 1               | 0                | 0                | 0                 | 0                 |
| 1               | 0                | 0                | 0                 | 0                 |
| 1               | 0                | 0                | 0                 | 0                 |
| 1               | 0                | 0                | 0                 | 0                 |
| 1               | 0                | 0                | 0                 | 0                 |
| 1               | 0                | 0                | 0                 | 0                 |
| 1               | 1                | 0                | 0                 | 0                 |
| 0               | 0                | 0                | 1                 | 0                 |
| 0               | 0                | 0                | 0                 | 0                 |
| 0               | 1                | 0                | 0                 | 0                 |
| 1               | 0                | 0                | 1                 | 1                 |
| 0               | 0                | 0                | 0                 | 0                 |
| 0               | 0                | 0                | 0                 | 0                 |
| 0               | 0                | 0                | 0                 | 0                 |
| 0               | 0                | 0                | 0                 | 0                 |
| <b>Syllidae</b> | <b>Veneridae</b> | <b>Lucinidae</b> | <b>Corbulidae</b> | <b>Tellinidae</b> |
| 0               | 0                | 1                | 0                 | 1                 |
| 0               | 0                | 0                | 0                 | 0                 |
| 0               | 0                | 0                | 0                 | 0                 |
| 0               | 0                | 0                | 0                 | 1                 |
| 0               | 0                | 0                | 0                 | 0                 |
| 0               | 0                | 0                | 0                 | 0                 |
| 0               | 0                | 0                | 0                 | 1                 |
| 0               | 0                | 0                | 0                 | 1                 |

|   |   |   |   |   |
|---|---|---|---|---|
| 0 | 0 | 0 | 0 | 1 |
| 0 | 0 | 0 | 0 | 0 |
| 0 | 0 | 0 | 0 | 0 |
| 0 | 0 | 0 | 0 | 1 |
| 0 | 0 | 0 | 0 | 0 |
| 0 | 0 | 0 | 1 | 0 |
| 0 | 0 | 0 | 1 | 1 |
| 0 | 0 | 0 | 0 | 0 |
| 0 | 0 | 0 | 0 | 0 |
| 0 | 0 | 0 | 0 | 1 |
| 0 | 0 | 0 | 0 | 1 |
| 0 | 0 | 0 | 0 | 0 |
| 0 | 0 | 0 | 0 | 1 |
| 0 | 0 | 0 | 0 | 0 |
| 0 | 0 | 0 | 1 | 0 |
| 1 | 1 | 0 | 1 | 1 |
| 0 | 0 | 0 | 0 | 0 |
| 1 | 0 | 0 | 1 | 0 |
| 0 | 0 | 0 | 0 | 0 |
| 0 | 0 | 0 | 0 | 0 |
| 0 | 0 | 0 | 0 | 0 |
| 0 | 0 | 0 | 0 | 0 |
| 0 | 0 | 0 | 0 | 0 |
| 0 | 0 | 0 | 0 | 0 |
| 0 | 0 | 0 | 0 | 0 |
| 0 | 0 | 0 | 0 | 0 |
| 0 | 0 | 0 | 0 | 0 |
| 0 | 0 | 0 | 0 | 0 |
| 0 | 0 | 0 | 0 | 0 |
| 0 | 0 | 0 | 0 | 0 |
| 0 | 0 | 0 | 0 | 0 |
| 0 | 0 | 0 | 0 | 0 |
| 0 | 0 | 0 | 0 | 0 |
| 0 | 0 | 0 | 0 | 0 |
| 0 | 0 | 0 | 0 | 0 |
| 0 | 0 | 0 | 0 | 0 |
| 0 | 0 | 0 | 0 | 0 |
| 1 | 0 | 0 | 1 | 1 |
| 0 | 0 | 0 | 0 | 0 |
| 1 | 0 | 0 | 1 | 0 |
| 1 | 0 | 0 | 0 | 0 |
| 0 | 0 | 0 | 0 | 0 |
| 1 | 0 | 0 | 0 | 0 |
| 0 | 0 | 0 | 0 | 1 |
| 0 | 0 | 0 | 0 | 1 |

|   |   |   |   |   |
|---|---|---|---|---|
| 0 | 0 | 0 | 0 | 1 |
| 0 | 0 | 0 | 0 | 0 |
| 0 | 0 | 0 | 0 | 0 |
| 0 | 0 | 0 | 0 | 0 |
| 0 | 1 | 0 | 0 | 1 |
| 1 | 0 | 0 | 0 | 1 |
| 1 | 0 | 0 | 0 | 1 |
| 0 | 0 | 0 | 0 | 0 |
| 0 | 0 | 0 | 0 | 1 |
| 0 | 0 | 0 | 0 | 1 |
| 0 | 0 | 0 | 0 | 1 |
| 0 | 0 | 0 | 0 | 1 |
| 0 | 0 | 0 | 0 | 1 |
| 0 | 0 | 0 | 0 | 0 |
| 0 | 0 | 0 | 0 | 0 |
| 0 | 1 | 0 | 0 | 1 |
| 0 | 0 | 0 | 1 | 1 |
| 0 | 0 | 0 | 0 | 0 |
| 0 | 0 | 0 | 0 | 0 |
| 0 | 0 | 0 | 0 | 1 |
| 0 | 0 | 0 | 0 | 1 |
| 0 | 0 | 0 | 0 | 1 |
| 0 | 0 | 0 | 0 | 1 |
| 0 | 0 | 0 | 0 | 1 |
| 0 | 0 | 0 | 0 | 1 |
| 0 | 0 | 0 | 0 | 1 |
| 0 | 0 | 0 | 0 | 1 |
| 0 | 0 | 0 | 0 | 1 |
| 0 | 0 | 0 | 0 | 1 |
| 0 | 0 | 0 | 0 | 1 |
| 0 | 0 | 0 | 0 | 1 |
| 0 | 0 | 0 | 0 | 0 |
| 0 | 0 | 0 | 0 | 0 |
| 0 | 0 | 0 | 0 | 0 |
| 0 | 0 | 0 | 0 | 0 |
| 0 | 0 | 0 | 0 | 0 |
| 0 | 0 | 0 | 0 | 0 |
| 0 | 0 | 0 | 0 | 0 |
| 0 | 0 | 0 | 0 | 0 |
| 0 | 0 | 0 | 0 | 0 |
| 0 | 0 | 0 | 0 | 0 |
| 0 | 0 | 0 | 0 | 0 |
| 0 | 0 | 0 | 0 | 0 |
| 0 | 0 | 0 | 0 | 0 |
| 0 | 0 | 0 | 0 | 0 |
| 1 | 0 | 0 | 0 | 1 |
| 0 | 0 | 0 | 0 | 1 |
| 0 | 0 | 0 | 0 | 1 |
| 0 | 0 | 0 | 0 | 1 |
| 0 | 0 | 0 | 0 | 1 |
| 0 | 0 | 0 | 0 | 1 |
| 0 | 0 | 0 | 0 | 1 |
| 0 | 1 | 0 | 0 | 1 |
| 0 | 0 | 0 | 0 | 0 |

|   |   |   |   |   |
|---|---|---|---|---|
| 0 | 0 | 0 | 0 | 0 |
| 0 | 0 | 0 | 0 | 0 |
| 0 | 1 | 0 | 1 | 1 |
| 0 | 1 | 0 | 1 | 0 |
| 1 | 0 | 0 | 1 | 0 |
| 0 | 1 | 0 | 1 | 1 |
| 0 | 1 | 1 | 1 | 1 |
| 0 | 1 | 0 | 0 | 1 |
| 0 | 0 | 0 | 1 | 1 |
| 0 | 0 | 0 | 0 | 1 |
| 0 | 0 | 0 | 0 | 1 |
| 0 | 1 | 0 | 0 | 1 |
| 1 | 1 | 0 | 0 | 1 |
| 0 | 0 | 0 | 0 | 1 |
| 1 | 0 | 0 | 0 | 1 |
| 1 | 1 | 1 | 0 | 1 |
| 1 | 1 | 0 | 0 | 1 |
| 0 | 1 | 0 | 0 | 1 |
| 0 | 0 | 0 | 0 | 1 |
| 0 | 1 | 0 | 0 | 1 |
| 0 | 0 | 0 | 0 | 1 |
| 0 | 0 | 0 | 0 | 1 |
| 0 | 0 | 0 | 0 | 1 |
| 0 | 0 | 1 | 0 | 1 |
| 0 | 0 | 0 | 0 | 1 |
| 0 | 0 | 0 | 0 | 1 |
| 1 | 0 | 0 | 0 | 1 |
| 0 | 0 | 1 | 0 | 1 |
| 0 | 1 | 1 | 1 | 1 |
| 0 | 0 | 1 | 0 | 1 |
| 0 | 0 | 0 | 0 | 1 |
| 0 | 0 | 0 | 0 | 1 |
| 0 | 0 | 0 | 1 | 1 |
| 0 | 0 | 0 | 1 | 1 |
| 0 | 0 | 0 | 0 | 1 |
| 0 | 1 | 0 | 1 | 1 |
| 0 | 0 | 1 | 0 | 1 |
| 1 | 0 | 1 | 0 | 1 |
| 0 | 1 | 0 | 0 | 1 |
| 0 | 1 | 0 | 0 | 1 |
| 0 | 1 | 0 | 0 | 1 |

**Mastridae**

0

**Mytillidae**

0

**Psammobiidae**

0

**Sipuncula**

0

**Columbellidae**

0

|   |   |   |   |   |
|---|---|---|---|---|
| 0 | 0 | 1 | 0 | 0 |
| 0 | 0 | 0 | 0 | 0 |
| 0 | 0 | 0 | 1 | 0 |
| 0 | 0 | 0 | 0 | 0 |
| 0 | 0 | 0 | 1 | 0 |
| 0 | 1 | 0 | 1 | 0 |
| 0 | 1 | 0 | 1 | 0 |
| 0 | 0 | 0 | 0 | 0 |
| 0 | 0 | 0 | 0 | 0 |
| 0 | 0 | 0 | 0 | 0 |
| 0 | 0 | 0 | 0 | 0 |
| 0 | 0 | 0 | 0 | 0 |
| 0 | 0 | 0 | 0 | 0 |
| 0 | 0 | 1 | 0 | 0 |
| 0 | 0 | 0 | 0 | 0 |
| 0 | 0 | 0 | 0 | 0 |
| 0 | 0 | 1 | 0 | 0 |
| 0 | 1 | 0 | 0 | 0 |
| 0 | 0 | 0 | 0 | 0 |
| 0 | 0 | 0 | 0 | 0 |
| 0 | 0 | 0 | 0 | 0 |
| 0 | 0 | 0 | 0 | 0 |
| 0 | 0 | 0 | 0 | 0 |
| 0 | 0 | 0 | 0 | 0 |
| 0 | 0 | 0 | 0 | 0 |
| 0 | 0 | 0 | 0 | 0 |
| 0 | 0 | 0 | 0 | 0 |
| 0 | 0 | 0 | 0 | 0 |
| 0 | 0 | 0 | 0 | 0 |
| 0 | 0 | 0 | 0 | 0 |
| 0 | 0 | 0 | 0 | 0 |
| 0 | 0 | 0 | 0 | 0 |
| 0 | 0 | 0 | 0 | 0 |
| 0 | 0 | 0 | 0 | 0 |
| 0 | 0 | 0 | 0 | 0 |
| 0 | 0 | 0 | 0 | 0 |
| 0 | 0 | 0 | 0 | 0 |
| 0 | 0 | 0 | 0 | 0 |
| 0 | 0 | 0 | 0 | 0 |
| 1 | 0 | 0 | 1 | 1 |
| 0 | 0 | 0 | 0 | 0 |
| 0 | 0 | 0 | 0 | 0 |
| 0 | 0 | 0 | 0 | 0 |
| 0 | 0 | 0 | 0 | 0 |
| 0 | 0 | 0 | 0 | 0 |
| 0 | 0 | 1 | 0 | 0 |
| 0 | 0 | 0 | 0 | 0 |
| 0 | 1 | 0 | 0 | 0 |
| 0 | 0 | 0 | 0 | 0 |
| 0 | 0 | 1 | 0 | 0 |

|   |   |   |   |   |
|---|---|---|---|---|
| 0 | 0 | 0 | 0 | 0 |
| 0 | 0 | 0 | 0 | 0 |
| 0 | 0 | 0 | 0 | 0 |
| 0 | 0 | 0 | 0 | 0 |
| 0 | 0 | 0 | 0 | 0 |
| 0 | 0 | 0 | 0 | 0 |
| 0 | 0 | 0 | 0 | 0 |
| 0 | 0 | 0 | 0 | 0 |
| 0 | 0 | 0 | 0 | 0 |
| 0 | 0 | 0 | 0 | 0 |
| 0 | 0 | 0 | 0 | 0 |
| 0 | 0 | 0 | 0 | 0 |
| 0 | 0 | 0 | 1 | 0 |
| 0 | 0 | 0 | 1 | 0 |
| 0 | 0 | 0 | 1 | 0 |
| 0 | 0 | 0 | 1 | 0 |
| 0 | 0 | 0 | 1 | 0 |
| 0 | 0 | 0 | 1 | 0 |
| 0 | 0 | 0 | 0 | 0 |
| 0 | 0 | 0 | 0 | 0 |
| 0 | 0 | 0 | 0 | 0 |
| 0 | 0 | 0 | 0 | 0 |
| 0 | 0 | 0 | 0 | 0 |
| 0 | 0 | 0 | 0 | 0 |
| 0 | 0 | 0 | 0 | 0 |
| 0 | 0 | 0 | 0 | 0 |
| 0 | 0 | 0 | 1 | 0 |
| 0 | 0 | 0 | 1 | 0 |
| 0 | 0 | 0 | 0 | 0 |
| 0 | 0 | 0 | 1 | 0 |
| 0 | 0 | 0 | 0 | 0 |
| 0 | 0 | 0 | 0 | 0 |
| 0 | 0 | 0 | 0 | 0 |
| 0 | 0 | 0 | 0 | 0 |
| 0 | 0 | 0 | 0 | 0 |
| 0 | 0 | 0 | 0 | 0 |
| 0 | 0 | 0 | 0 | 0 |
| 0 | 0 | 1 | 0 | 0 |
| 0 | 0 | 0 | 0 | 0 |
| 0 | 0 | 0 | 0 | 0 |
| 0 | 0 | 0 | 0 | 0 |
| 0 | 0 | 0 | 0 | 0 |
| 0 | 0 | 0 | 0 | 0 |
| 0 | 0 | 0 | 0 | 0 |
| 0 | 0 | 0 | 0 | 0 |
| 0 | 0 | 0 | 0 | 0 |
| 0 | 0 | 0 | 0 | 0 |
| 0 | 0 | 0 | 1 | 0 |
| 0 | 0 | 0 | 0 | 0 |





|                      |                         |                  |                  |                         |
|----------------------|-------------------------|------------------|------------------|-------------------------|
| 0                    | 0                       | 1                | 0                | 0                       |
| 0                    | 0                       | 0                | 0                | 0                       |
| 0                    | 0                       | 0                | 0                | 0                       |
| 0                    | 0                       | 0                | 0                | 0                       |
| 0                    | 0                       | 1                | 0                | 0                       |
| <b>Vitrinellidae</b> | <b>Ischnochitonidae</b> | <b>Xanthidae</b> | <b>Paguridae</b> | <b>Branchiostomidae</b> |
| 0                    | 0                       | 0                | 0                | 0                       |
| 0                    | 0                       | 0                | 0                | 0                       |
| 0                    | 0                       | 0                | 0                | 0                       |
| 0                    | 0                       | 0                | 0                | 0                       |
| 0                    | 0                       | 0                | 0                | 0                       |
| 0                    | 0                       | 0                | 0                | 0                       |
| 0                    | 0                       | 0                | 0                | 0                       |
| 0                    | 0                       | 0                | 0                | 0                       |
| 0                    | 0                       | 0                | 0                | 1                       |
| 0                    | 0                       | 0                | 0                | 0                       |
| 0                    | 0                       | 0                | 0                | 0                       |
| 0                    | 0                       | 0                | 0                | 0                       |
| 0                    | 0                       | 0                | 0                | 0                       |
| 0                    | 0                       | 0                | 0                | 0                       |
| 0                    | 0                       | 0                | 0                | 0                       |
| 0                    | 0                       | 0                | 0                | 0                       |
| 0                    | 0                       | 0                | 0                | 0                       |
| 0                    | 0                       | 0                | 0                | 0                       |
| 0                    | 0                       | 0                | 0                | 0                       |
| 0                    | 0                       | 0                | 0                | 0                       |
| 0                    | 1                       | 0                | 0                | 0                       |
| 0                    | 0                       | 0                | 0                | 0                       |
| 0                    | 0                       | 0                | 0                | 0                       |
| 0                    | 0                       | 0                | 0                | 0                       |
| 0                    | 0                       | 0                | 0                | 0                       |
| 0                    | 0                       | 0                | 0                | 0                       |
| 0                    | 0                       | 0                | 0                | 0                       |
| 0                    | 0                       | 0                | 0                | 0                       |
| 0                    | 0                       | 0                | 0                | 0                       |
| 0                    | 0                       | 0                | 0                | 0                       |
| 0                    | 0                       | 0                | 0                | 0                       |
| 0                    | 1                       | 1                | 1                | 0                       |
| 1                    | 0                       | 0                | 0                | 0                       |
| 0                    | 0                       | 0                | 0                | 0                       |

|   |   |   |   |   |
|---|---|---|---|---|
| 0 | 0 | 0 | 0 | 0 |
| 0 | 0 | 0 | 0 | 0 |
| 0 | 0 | 0 | 0 | 1 |
| 0 | 0 | 0 | 0 | 0 |
| 0 | 0 | 0 | 0 | 0 |
| 0 | 0 | 0 | 0 | 0 |
| 0 | 0 | 0 | 0 | 0 |
| 0 | 0 | 0 | 0 | 0 |
| 0 | 0 | 0 | 0 | 0 |
| 0 | 0 | 0 | 0 | 0 |
| 0 | 0 | 0 | 0 | 0 |
| 0 | 0 | 0 | 1 | 0 |
| 0 | 0 | 0 | 0 | 0 |
| 0 | 0 | 0 | 0 | 0 |
| 0 | 0 | 0 | 0 | 0 |
| 0 | 0 | 0 | 0 | 0 |
| 0 | 0 | 0 | 0 | 0 |
| 0 | 0 | 0 | 0 | 0 |
| 0 | 0 | 0 | 0 | 1 |
| 0 | 0 | 0 | 0 | 1 |
| 0 | 0 | 0 | 0 | 1 |
| 0 | 0 | 0 | 0 | 0 |
| 0 | 0 | 0 | 0 | 0 |
| 0 | 0 | 0 | 0 | 0 |
| 0 | 0 | 0 | 0 | 0 |
| 0 | 0 | 0 | 0 | 0 |
| 0 | 0 | 0 | 0 | 0 |
| 0 | 0 | 0 | 0 | 0 |
| 0 | 0 | 0 | 0 | 0 |
| 0 | 0 | 0 | 0 | 0 |
| 0 | 0 | 0 | 0 | 0 |
| 0 | 0 | 0 | 0 | 0 |
| 0 | 0 | 1 | 0 | 1 |
| 0 | 0 | 0 | 0 | 0 |
| 0 | 0 | 0 | 0 | 0 |
| 0 | 0 | 0 | 0 | 0 |
| 0 | 0 | 0 | 0 | 0 |
| 0 | 0 | 0 | 0 | 0 |
| 0 | 0 | 0 | 0 | 0 |
| 0 | 0 | 0 | 0 | 0 |
| 0 | 0 | 0 | 0 | 0 |
| 0 | 0 | 0 | 0 | 0 |
| 0 | 0 | 0 | 0 | 0 |
| 0 | 0 | 0 | 0 | 0 |
| 0 | 0 | 0 | 0 | 0 |
| 0 | 0 | 0 | 0 | 0 |
| 0 | 0 | 0 | 0 | 0 |
| 0 | 0 | 0 | 0 | 0 |
| 0 | 0 | 0 | 0 | 0 |
| 0 | 0 | 0 | 0 | 1 |
| 0 | 0 | 0 | 1 | 1 |
| 0 | 0 | 0 | 0 | 0 |
| 0 | 0 | 0 | 0 | 0 |
| 0 | 0 | 0 | 1 | 0 |

|   |   |   |   |   |
|---|---|---|---|---|
| 0 | 0 | 0 | 0 | 0 |
| 0 | 0 | 0 | 0 | 0 |
| 0 | 0 | 0 | 0 | 0 |
| 0 | 0 | 0 | 0 | 0 |
| 0 | 0 | 0 | 0 | 0 |
| 0 | 0 | 0 | 0 | 1 |
| 0 | 0 | 0 | 0 | 1 |
| 0 | 0 | 0 | 0 | 1 |
| 0 | 0 | 0 | 0 | 0 |
| 0 | 0 | 0 | 0 | 0 |
| 0 | 0 | 0 | 0 | 0 |
| 0 | 0 | 0 | 0 | 0 |
| 0 | 0 | 0 | 0 | 0 |
| 0 | 0 | 0 | 0 | 0 |
| 0 | 0 | 0 | 0 | 0 |
| 0 | 0 | 0 | 0 | 0 |
| 0 | 0 | 0 | 0 | 0 |
| 0 | 0 | 0 | 0 | 0 |
| 0 | 0 | 0 | 0 | 0 |
| 0 | 0 | 0 | 1 | 0 |
| 0 | 0 | 0 | 0 | 0 |
| 0 | 0 | 0 | 0 | 0 |
| 0 | 0 | 0 | 0 | 0 |
| 0 | 0 | 0 | 0 | 0 |
| 0 | 0 | 0 | 0 | 0 |
| 0 | 0 | 0 | 0 | 0 |
| 0 | 0 | 0 | 0 | 0 |
| 0 | 0 | 0 | 0 | 0 |
| 0 | 0 | 0 | 1 | 1 |
| 0 | 0 | 1 | 0 | 0 |
| 0 | 0 | 1 | 0 | 0 |
| 0 | 0 | 0 | 0 | 0 |
| 0 | 0 | 0 | 0 | 0 |
| 0 | 0 | 0 | 0 | 0 |
| 0 | 0 | 0 | 0 | 0 |
| 0 | 0 | 0 | 0 | 0 |
| 0 | 0 | 0 | 0 | 0 |
| 0 | 0 | 0 | 0 | 0 |
| 0 | 0 | 1 | 0 | 0 |
| 0 | 0 | 0 | 0 | 0 |
| 0 | 0 | 0 | 0 | 0 |
| 0 | 0 | 0 | 0 | 0 |
| 0 | 0 | 0 | 0 | 0 |
| 0 | 0 | 0 | 1 | 0 |
| 0 | 0 | 0 | 1 | 0 |
| 0 | 0 | 0 | 1 | 0 |
| 0 | 0 | 0 | 0 | 0 |
| 0 | 0 | 0 | 0 | 0 |

















|   |   |   |   |   |
|---|---|---|---|---|
| 0 | 0 | 0 | 0 | 0 |
| 0 | 0 | 0 | 0 | 0 |
| 0 | 0 | 0 | 0 | 0 |
| 0 | 0 | 0 | 0 | 0 |
| 0 | 0 | 0 | 0 | 0 |
| 0 | 0 | 0 | 0 | 0 |
| 0 | 0 | 0 | 0 | 0 |
| 0 | 0 | 1 | 0 | 1 |
| 0 | 0 | 0 | 0 | 0 |
| 0 | 0 | 0 | 0 | 0 |
| 0 | 0 | 0 | 1 | 0 |
| 0 | 0 | 0 | 1 | 0 |
| 0 | 0 | 0 | 0 | 0 |
| 0 | 0 | 0 | 0 | 0 |
| 0 | 0 | 0 | 0 | 0 |
| 0 | 0 | 0 | 0 | 0 |
| 0 | 0 | 0 | 0 | 0 |
| 1 | 1 | 0 | 0 | 0 |
| 0 | 0 | 0 | 0 | 0 |
| 0 | 0 | 0 | 0 | 0 |
| 0 | 1 | 0 | 0 | 0 |
| 0 | 0 | 0 | 0 | 0 |
| 0 | 0 | 0 | 0 | 0 |
| 0 | 0 | 0 | 0 | 0 |
| 0 | 0 | 0 | 0 | 0 |
| 0 | 0 | 0 | 0 | 0 |
| 0 | 0 | 0 | 0 | 0 |
| 0 | 0 | 0 | 0 | 0 |
| 0 | 0 | 0 | 0 | 0 |
| 0 | 0 | 0 | 0 | 0 |
| 0 | 0 | 0 | 0 | 0 |
| 0 | 0 | 0 | 0 | 0 |
| 0 | 0 | 0 | 0 | 0 |
| 0 | 0 | 0 | 0 | 0 |
| 0 | 0 | 0 | 0 | 0 |
| 0 | 0 | 0 | 0 | 0 |
| 0 | 0 | 0 | 0 | 0 |
| 1 | 0 | 1 | 1 | 1 |
| 0 | 0 | 0 | 1 | 0 |
| 0 | 0 | 0 | 1 | 0 |
| 0 | 0 | 0 | 0 | 0 |
| 1 | 0 | 0 | 1 | 0 |
| 0 | 0 | 0 | 0 | 0 |
| 0 | 0 | 0 | 0 | 0 |
| 0 | 0 | 0 | 0 | 0 |
| 0 | 0 | 0 | 0 | 0 |
| 0 | 0 | 0 | 0 | 0 |
| 0 | 0 | 0 | 0 | 0 |
| 0 | 0 | 0 | 0 | 0 |
| 0 | 0 | 0 | 0 | 0 |
| 0 | 0 | 1 | 0 | 0 |
| 0 | 0 | 1 | 0 | 0 |
| 0 | 0 | 1 | 0 | 0 |
| 0 | 0 | 0 | 0 | 0 |

|   |   |   |   |   |
|---|---|---|---|---|
| 0 | 0 | 0 | 0 | 0 |
| 0 | 0 | 0 | 0 | 0 |
| 0 | 0 | 0 | 0 | 0 |
| 0 | 0 | 0 | 0 | 0 |
| 0 | 0 | 0 | 0 | 0 |
| 0 | 0 | 0 | 0 | 0 |
| 0 | 0 | 0 | 0 | 0 |
| 0 | 0 | 0 | 0 | 0 |
| 0 | 0 | 1 | 0 | 0 |
| 0 | 0 | 0 | 0 | 0 |
| 0 | 0 | 0 | 0 | 0 |
| 0 | 0 | 0 | 0 | 0 |
| 0 | 0 | 0 | 0 | 0 |
| 0 | 0 | 0 | 1 | 0 |
| 0 | 0 | 0 | 0 | 0 |
| 1 | 0 | 0 | 0 | 0 |
| 1 | 1 | 0 | 0 | 1 |
| 0 | 0 | 0 | 0 | 0 |
| 0 | 0 | 0 | 0 | 0 |
| 0 | 0 | 0 | 0 | 0 |
| 0 | 0 | 0 | 0 | 0 |
| 0 | 0 | 0 | 0 | 1 |
| 0 | 0 | 0 | 0 | 0 |
| 0 | 0 | 0 | 0 | 0 |
| 0 | 0 | 0 | 0 | 0 |
| 0 | 0 | 0 | 0 | 0 |
| 0 | 0 | 0 | 0 | 0 |
| 0 | 0 | 0 | 0 | 0 |
| 0 | 0 | 0 | 0 | 0 |
| 0 | 0 | 0 | 0 | 0 |
| 0 | 0 | 0 | 0 | 0 |
| 0 | 0 | 0 | 0 | 0 |
| 0 | 0 | 0 | 0 | 0 |
| 0 | 0 | 0 | 0 | 0 |
| 0 | 0 | 0 | 0 | 0 |
| 0 | 0 | 0 | 0 | 0 |
| 0 | 0 | 0 | 0 | 0 |
| 0 | 0 | 1 | 0 | 0 |
| 0 | 0 | 1 | 0 | 0 |
| 0 | 0 | 0 | 0 | 0 |
| 0 | 0 | 0 | 0 | 0 |
| 0 | 0 | 0 | 1 | 0 |
| 0 | 0 | 0 | 1 | 0 |







|                         |                      |                   |                   |                       |
|-------------------------|----------------------|-------------------|-------------------|-----------------------|
| 0                       | 0                    | 0                 | 0                 | 0                     |
| 1                       | 0                    | 0                 | 0                 | 0                     |
| 1                       | 0                    | 0                 | 0                 | 0                     |
| 0                       | 0                    | 0                 | 0                 | 1                     |
| 0                       | 0                    | 0                 | 0                 | 0                     |
| 0                       | 0                    | 0                 | 0                 | 0                     |
| 1                       | 0                    | 0                 | 0                 | 0                     |
| 0                       | 0                    | 0                 | 0                 | 0                     |
| 0                       | 0                    | 0                 | 0                 | 0                     |
| 0                       | 0                    | 0                 | 0                 | 0                     |
| 0                       | 0                    | 0                 | 0                 | 0                     |
| 0                       | 0                    | 0                 | 0                 | 0                     |
| 0                       | 0                    | 0                 | 0                 | 0                     |
| 1                       | 0                    | 0                 | 0                 | 0                     |
| 0                       | 0                    | 0                 | 0                 | 0                     |
| 0                       | 0                    | 0                 | 0                 | 0                     |
| 0                       | 0                    | 0                 | 0                 | 0                     |
| 0                       | 0                    | 0                 | 0                 | 0                     |
| 1                       | 0                    | 0                 | 0                 | 0                     |
| 0                       | 0                    | 0                 | 1                 | 0                     |
| 0                       | 0                    | 0                 | 1                 | 0                     |
| 1                       | 0                    | 0                 | 1                 | 0                     |
| 0                       | 0                    | 0                 | 1                 | 1                     |
| 0                       | 0                    | 0                 | 1                 | 1                     |
| 0                       | 1                    | 0                 | 1                 | 0                     |
| 0                       | 1                    | 0                 | 0                 | 0                     |
| 0                       | 0                    | 0                 | 1                 | 1                     |
| 0                       | 0                    | 0                 | 1                 | 0                     |
| 0                       | 0                    | 0                 | 0                 | 0                     |
| 0                       | 0                    | 0                 | 1                 | 0                     |
| 0                       | 0                    | 0                 | 1                 | 0                     |
| 0                       | 0                    | 0                 | 0                 | 0                     |
| 0                       | 0                    | 0                 | 1                 | 0                     |
| 0                       | 0                    | 0                 | 0                 | 0                     |
| 0                       | 0                    | 0                 | 0                 | 0                     |
| 0                       | 1                    | 0                 | 0                 | 0                     |
| 0                       | 0                    | 0                 | 0                 | 0                     |
| 0                       | 0                    | 0                 | 0                 | 0                     |
| 0                       | 0                    | 0                 | 0                 | 0                     |
| <b>Paralacydoniidae</b> | <b>Turbonillidae</b> | <b>Tanaidaceo</b> | <b>Gammaridea</b> | <b>Callianassidae</b> |
| 0                       | 0                    | 0                 | 0                 | 0                     |
| 0                       | 0                    | 0                 | 0                 | 0                     |







|   |   |   |   |   |
|---|---|---|---|---|
| 0 | 0 | 0 | 0 | 0 |
| 0 | 0 | 0 | 0 | 0 |
| 0 | 0 | 0 | 0 | 0 |
| 0 | 0 | 0 | 0 | 0 |
| 0 | 0 | 0 | 0 | 0 |
| 0 | 0 | 0 | 0 | 0 |
| 0 | 0 | 0 | 0 | 0 |
| 0 | 0 | 0 | 0 | 0 |
| 0 | 0 | 1 | 1 | 0 |
| 0 | 0 | 0 | 0 | 0 |
| 0 | 0 | 0 | 1 | 0 |
| 0 | 0 | 1 | 0 | 0 |
| 0 | 0 | 0 | 0 | 0 |
| 0 | 0 | 1 | 0 | 0 |
| 0 | 0 | 0 | 0 | 0 |
| 0 | 0 | 0 | 0 | 0 |
| 0 | 0 | 0 | 0 | 0 |
| 0 | 0 | 1 | 0 | 0 |
| 0 | 0 | 0 | 0 | 0 |
| 0 | 0 | 0 | 0 | 0 |
| 0 | 0 | 0 | 0 | 0 |
| 0 | 0 | 0 | 0 | 0 |
| 0 | 0 | 0 | 0 | 0 |
| 0 | 0 | 0 | 0 | 0 |
| 0 | 0 | 1 | 0 | 1 |
| 1 | 0 | 0 | 0 | 0 |
| 0 | 0 | 0 | 0 | 0 |
| 0 | 0 | 0 | 0 | 0 |
| 0 | 0 | 0 | 1 | 0 |
| 0 | 0 | 0 | 0 | 0 |
| 0 | 0 | 0 | 0 | 0 |
| 0 | 0 | 0 | 0 | 0 |
| 0 | 0 | 0 | 0 | 0 |
| 0 | 0 | 0 | 0 | 0 |
| 0 | 0 | 0 | 0 | 0 |
| 0 | 0 | 0 | 0 | 0 |
| 0 | 0 | 0 | 0 | 0 |
| 0 | 0 | 0 | 0 | 0 |
| 0 | 0 | 0 | 0 | 0 |
| 0 | 0 | 0 | 0 | 0 |
| 0 | 0 | 0 | 0 | 0 |
| 0 | 0 | 0 | 0 | 0 |
| 0 | 0 | 0 | 0 | 0 |
| 0 | 0 | 0 | 0 | 0 |
| 0 | 0 | 0 | 0 | 0 |
| 0 | 0 | 0 | 0 | 0 |
| 0 | 0 | 0 | 0 | 0 |
| 0 | 0 | 0 | 0 | 0 |
| 0 | 0 | 0 | 0 | 0 |
| 0 | 0 | 0 | 0 | 0 |
| 0 | 0 | 0 | 0 | 0 |
| 0 | 0 | 0 | 0 | 0 |
| 0 | 0 | 0 | 1 | 0 |
| 0 | 0 | 0 | 0 | 0 |



|   |   |   |   |   |
|---|---|---|---|---|
| 0 | 0 | 0 | 0 | 0 |
| 0 | 0 | 0 | 0 | 0 |
| 0 | 0 | 0 | 0 | 0 |
| 0 | 0 | 0 | 0 | 0 |
| 0 | 0 | 0 | 0 | 0 |
| 0 | 0 | 0 | 0 | 0 |
| 0 | 0 | 0 | 0 | 0 |
| 0 | 0 | 1 | 1 | 0 |
| 0 | 0 | 0 | 0 | 0 |
| 0 | 0 | 0 | 1 | 0 |
| 0 | 0 | 0 | 0 | 0 |
| 0 | 0 | 0 | 0 | 0 |
| 0 | 0 | 0 | 1 | 0 |
| 0 | 0 | 0 | 0 | 0 |
| 0 | 0 | 0 | 1 | 0 |
| 0 | 0 | 0 | 1 | 0 |
| 0 | 0 | 0 | 0 | 0 |
| 0 | 0 | 0 | 1 | 0 |
| 0 | 0 | 0 | 1 | 0 |
| 0 | 0 | 0 | 1 | 0 |
| 0 | 0 | 0 | 1 | 0 |
| 0 | 0 | 0 | 1 | 0 |
| 0 | 0 | 0 | 1 | 0 |
| 0 | 0 | 0 | 1 | 0 |
| 0 | 1 | 0 | 0 | 1 |
| 0 | 0 | 0 | 0 | 0 |
| 0 | 0 | 0 | 0 | 0 |
| 0 | 0 | 0 | 0 | 0 |
| 0 | 0 | 0 | 0 | 0 |
| 0 | 0 | 0 | 0 | 0 |
| 0 | 0 | 0 | 0 | 0 |
| 0 | 0 | 0 | 0 | 0 |
| 0 | 0 | 0 | 0 | 0 |
| 0 | 0 | 0 | 0 | 0 |
| 0 | 0 | 0 | 0 | 0 |
| 0 | 0 | 0 | 0 | 0 |
| 0 | 0 | 0 | 0 | 0 |
| 0 | 0 | 0 | 0 | 0 |
| 0 | 0 | 0 | 0 | 0 |
| 0 | 0 | 0 | 0 | 0 |
| 1 | 0 | 0 | 0 | 1 |
| 0 | 0 | 0 | 0 | 1 |
| 0 | 0 | 1 | 0 | 1 |
| 0 | 0 | 0 | 0 | 0 |
| 0 | 0 | 0 | 1 | 1 |
| 0 | 0 | 0 | 1 | 0 |
| 0 | 0 | 0 | 1 | 1 |









|   |   |   |   |   |
|---|---|---|---|---|
| 0 | 0 | 0 | 0 | 0 |
| 0 | 0 | 0 | 0 | 0 |
| 1 | 0 | 0 | 0 | 0 |
| 0 | 0 | 0 | 0 | 0 |
| 0 | 0 | 1 | 0 | 0 |
| 0 | 0 | 0 | 0 | 0 |
| 0 | 0 | 0 | 0 | 0 |
| 0 | 0 | 0 | 0 | 0 |
| 0 | 0 | 0 | 0 | 0 |
| 0 | 0 | 0 | 0 | 0 |
| 0 | 0 | 0 | 0 | 0 |
| 0 | 0 | 0 | 0 | 0 |
| 0 | 0 | 0 | 0 | 0 |
| 0 | 0 | 0 | 0 | 0 |
| 0 | 0 | 0 | 0 | 0 |
| 0 | 0 | 0 | 0 | 0 |
| 0 | 0 | 0 | 0 | 0 |
| 0 | 0 | 0 | 0 | 0 |
| 0 | 0 | 0 | 0 | 0 |
| 0 | 0 | 0 | 0 | 0 |
| 0 | 0 | 0 | 0 | 0 |
| 0 | 0 | 0 | 0 | 0 |
| 0 | 0 | 0 | 0 | 0 |
| 0 | 0 | 0 | 0 | 0 |
| 0 | 0 | 0 | 0 | 0 |
| 0 | 0 | 0 | 0 | 0 |
| 0 | 0 | 0 | 0 | 0 |
| 0 | 0 | 0 | 0 | 0 |
| 0 | 0 | 0 | 0 | 0 |
| 0 | 0 | 0 | 0 | 0 |
| 0 | 0 | 0 | 0 | 0 |
| 0 | 0 | 0 | 0 | 0 |
| 0 | 0 | 0 | 0 | 0 |
| 0 | 0 | 0 | 0 | 0 |
| 0 | 0 | 0 | 0 | 0 |
| 0 | 0 | 0 | 0 | 0 |
| 0 | 0 | 0 | 0 | 0 |
| 0 | 0 | 0 | 0 | 0 |
| 0 | 0 | 0 | 0 | 0 |
| 0 | 0 | 1 | 0 | 0 |
| 0 | 0 | 0 | 0 | 0 |
| 0 | 0 | 0 | 0 | 0 |
| 0 | 0 | 0 | 0 | 0 |
| 0 | 0 | 0 | 0 | 0 |
| 0 | 0 | 0 | 0 | 0 |
| 0 | 0 | 0 | 0 | 0 |
| 0 | 0 | 0 | 0 | 0 |
| 0 | 0 | 0 | 0 | 0 |
| 0 | 0 | 0 | 0 | 0 |
| 0 | 0 | 0 | 0 | 0 |
| 0 | 0 | 0 | 0 | 0 |
| 0 | 0 | 0 | 0 | 0 |
| 0 | 0 | 0 | 0 | 0 |
| 0 | 0 | 0 | 0 | 0 |
| 0 | 0 | 0 | 1 | 0 |
| 0 | 0 | 0 | 0 | 0 |

|                     |                      |                   |                    |                   |
|---------------------|----------------------|-------------------|--------------------|-------------------|
| 0                   | 0                    | 0                 | 0                  | 0                 |
| 0                   | 0                    | 0                 | 0                  | 0                 |
| 0                   | 0                    | 0                 | 0                  | 0                 |
| 0                   | 0                    | 0                 | 0                  | 0                 |
| 0                   | 0                    | 0                 | 0                  | 0                 |
| 0                   | 0                    | 0                 | 0                  | 0                 |
| 0                   | 0                    | 0                 | 0                  | 0                 |
| 0                   | 0                    | 0                 | 0                  | 0                 |
| 0                   | 0                    | 0                 | 1                  | 0                 |
| 0                   | 0                    | 0                 | 0                  | 0                 |
| 0                   | 1                    | 0                 | 0                  | 0                 |
| 0                   | 0                    | 0                 | 0                  | 0                 |
| 0                   | 0                    | 0                 | 0                  | 0                 |
| 0                   | 0                    | 0                 | 1                  | 0                 |
| 0                   | 0                    | 0                 | 0                  | 1                 |
| 0                   | 0                    | 0                 | 0                  | 0                 |
| 0                   | 0                    | 0                 | 0                  | 0                 |
| 0                   | 0                    | 0                 | 0                  | 0                 |
| <b>Amphinomidae</b> | <b>Pectinariidae</b> | <b>Polynoidae</b> | <b>Cirolanidae</b> | <b>Penaeoidea</b> |
| 0                   | 0                    | 0                 | 0                  | 0                 |
| 0                   | 0                    | 0                 | 0                  | 0                 |
| 0                   | 0                    | 0                 | 0                  | 0                 |
| 0                   | 0                    | 0                 | 0                  | 0                 |
| 0                   | 0                    | 0                 | 0                  | 0                 |
| 0                   | 0                    | 0                 | 0                  | 0                 |
| 0                   | 0                    | 0                 | 0                  | 0                 |
| 0                   | 0                    | 0                 | 0                  | 0                 |
| 0                   | 0                    | 0                 | 0                  | 0                 |
| 0                   | 0                    | 0                 | 0                  | 0                 |
| 0                   | 0                    | 0                 | 0                  | 0                 |
| 0                   | 0                    | 1                 | 0                  | 0                 |
| 0                   | 0                    | 1                 | 0                  | 0                 |
| 0                   | 0                    | 0                 | 0                  | 0                 |
| 0                   | 0                    | 0                 | 0                  | 0                 |
| 0                   | 0                    | 0                 | 0                  | 0                 |
| 0                   | 0                    | 0                 | 0                  | 0                 |
| 0                   | 0                    | 0                 | 0                  | 0                 |
| 0                   | 0                    | 0                 | 0                  | 0                 |
| 0                   | 0                    | 0                 | 0                  | 0                 |
| 0                   | 0                    | 0                 | 0                  | 0                 |
| 0                   | 0                    | 0                 | 0                  | 0                 |
| 0                   | 0                    | 1                 | 0                  | 1                 |
| 0                   | 1                    | 1                 | 0                  | 1                 |









































|   |   |   |   |   |
|---|---|---|---|---|
| 0 | 0 | 0 | 0 | 0 |
| 0 | 0 | 0 | 0 | 0 |
| 0 | 0 | 0 | 0 | 0 |
| 0 | 0 | 0 | 0 | 0 |
| 0 | 0 | 0 | 0 | 0 |
| 0 | 0 | 0 | 0 | 0 |
| 0 | 0 | 0 | 0 | 0 |
| 0 | 0 | 0 | 0 | 0 |
| 0 | 0 | 0 | 0 | 0 |
| 0 | 0 | 0 | 0 | 0 |
| 0 | 0 | 0 | 0 | 0 |
| 0 | 0 | 0 | 0 | 0 |
| 0 | 0 | 0 | 0 | 0 |
| 0 | 0 | 0 | 0 | 0 |
| 0 | 0 | 0 | 0 | 0 |
| 0 | 0 | 0 | 0 | 0 |
| 0 | 0 | 0 | 0 | 0 |
| 0 | 0 | 0 | 0 | 0 |
| 0 | 0 | 0 | 0 | 0 |
| 0 | 0 | 0 | 0 | 0 |
| 0 | 0 | 0 | 0 | 0 |
| 0 | 0 | 0 | 0 | 0 |
| 0 | 0 | 0 | 0 | 0 |

| Larva (Quironimidae) | Muricidae | NEMATODA | Flabelligeridae | PHOXOCEPHALIDAE | DE |
|----------------------|-----------|----------|-----------------|-----------------|----|
| 0                    | 0         | 0        | 0               | 0               |    |
| 0                    | 0         | 0        | 0               | 0               |    |
| 0                    | 0         | 0        | 0               | 0               |    |
| 0                    | 0         | 0        | 0               | 0               |    |
| 0                    | 0         | 0        | 0               | 0               |    |
| 0                    | 0         | 0        | 0               | 0               |    |
| 0                    | 0         | 0        | 0               | 0               |    |
| 0                    | 0         | 0        | 0               | 0               |    |
| 0                    | 0         | 0        | 0               | 0               |    |
| 0                    | 0         | 0        | 0               | 0               |    |
| 0                    | 0         | 0        | 0               | 0               |    |
| 0                    | 0         | 0        | 0               | 0               |    |
| 0                    | 0         | 0        | 0               | 0               |    |
| 0                    | 0         | 0        | 0               | 0               |    |
| 0                    | 0         | 0        | 0               | 0               |    |
| 0                    | 0         | 0        | 0               | 0               |    |
| 0                    | 0         | 0        | 0               | 0               |    |
| 0                    | 0         | 0        | 0               | 0               |    |
| 0                    | 0         | 0        | 0               | 0               |    |
| 0                    | 0         | 0        | 0               | 0               |    |
| 1                    | 0         | 0        | 0               | 0               |    |
| 0                    | 0         | 0        | 0               | 0               |    |
| 0                    | 0         | 0        | 0               | 0               |    |
| 0                    | 0         | 0        | 0               | 0               |    |











|   |   |   |   |   |   |
|---|---|---|---|---|---|
| 0 | 0 | 0 | 0 | 0 | 1 |
| 0 | 0 | 0 | 0 | 0 | 1 |
| 0 | 0 | 0 | 0 | 0 | 0 |
| 0 | 0 | 0 | 0 | 1 | 0 |
| 0 | 0 | 0 | 0 | 1 | 0 |
| 0 | 0 | 0 | 0 | 0 | 0 |
| 0 | 0 | 0 | 0 | 0 | 0 |
| 0 | 0 | 0 | 0 | 1 | 0 |
| 0 | 0 | 0 | 0 | 1 | 0 |
| 0 | 0 | 0 | 0 | 0 | 0 |
| 0 | 0 | 0 | 0 | 0 | 0 |
| 0 | 0 | 0 | 0 | 0 | 0 |
| 0 | 0 | 0 | 0 | 0 | 0 |
| 0 | 0 | 0 | 0 | 0 | 0 |
| 0 | 0 | 0 | 0 | 0 | 0 |
| 0 | 0 | 0 | 0 | 1 | 0 |
| 0 | 0 | 0 | 0 | 0 | 0 |
| 0 | 0 | 0 | 0 | 0 | 0 |
| 0 | 0 | 0 | 0 | 0 | 0 |
| 0 | 0 | 0 | 0 | 0 | 0 |
| 0 | 0 | 0 | 0 | 0 | 0 |
| 0 | 0 | 0 | 0 | 0 | 0 |
| 0 | 0 | 0 | 0 | 0 | 0 |
| 0 | 0 | 0 | 0 | 0 | 0 |
| 0 | 0 | 0 | 0 | 1 | 0 |
| 0 | 1 | 0 | 0 | 0 | 0 |
| 0 | 0 | 0 | 0 | 0 | 1 |
| 0 | 0 | 0 | 0 | 0 | 0 |
| 0 | 0 | 0 | 0 | 0 | 0 |
