# Supplementary material for: Drivers of benthic metacommunity structure along tropical estuaries
Source: PubMed Central journal article supplement (PMC6997391; doi:10.1038/s41598-020-58631-1), 2020-02-03
Supplement: 41598_2020_58631_MOESM3_ESM.pdf [file 41598_2020_58631_MOESM3_ESM.pdf]

## Drivers of benthic metacommunity structure along tropical estuaries

Andreia Teixeira Alves<sup>1\*</sup>, Danielle Katharine Petsch<sup>2</sup>, Francisco Barros<sup>1</sup>

\*Corresponding author e-mail address: [dea\\_alves106@yahoo.com.br](mailto:dea_alves106@yahoo.com.br) ; Telephone: +55 71991542200 1.

1. Laboratório de Ecologia Bentônica (LEB), Instituto de Biologia, Programa de Pós Graduação em Ecologia e Biomonitoramento, Universidade Federal da Bahia, Brazil

2. Núcleo de Pesquisas em Limnologia, Ictiologia e Aquicultura (Nupelia), Programa de Pós- Graduação em Ecologia de Ambientes Aquáticos Continentais (PEA), Universidade Estadual de Maringá, Brazil

### Supplementary Dataset Environmental Data

| Estuary | Month    | Year | Sites | Salinity | Pebble | Gravel |
|---------|----------|------|-------|----------|--------|--------|
| Subaé   | March    | 2013 | #1    | 35,1     | 0      | 0,45   |
| Subaé   | March    | 2013 | #2    | 35,07    | 0      | 0,15   |
| Subaé   | March    | 2013 | #3    | 35,32    | 0      | 0,44   |
| Subaé   | March    | 2013 | #4    | 34,1     | 0      | 0      |
| Subaé   | March    | 2013 | #5    | 32,56    | 0      | 4,67   |
| Subaé   | March    | 2013 | #6    | 28,68    | 0      | 0,46   |
| Subaé   | March    | 2013 | #7    | 24,8     | 0      | 3,52   |
| Subaé   | March    | 2013 | #8    | 17,16    | 0      | 0,67   |
| Subaé   | March    | 2013 | #9    | 13,3     | 0      | 0      |
| Subaé   | March    | 2013 | #10   | 10,89    | 0      | 0,28   |
| Subaé   | March    | 2013 | #11   | 10,17    | 0      | 4,15   |
| Subaé   | April    | 2011 | #1    | 35       | 0      | 0      |
| Subaé   | April    | 2011 | #2    | 36       | 0      | 0,22   |
| Subaé   | April    | 2011 | #3    | 36       | 0      | 0      |
| Subaé   | April    | 2011 | #4    | 35       | 0      | 0,02   |
| Subaé   | April    | 2011 | #5    | 32       | 0      | 4,07   |
| Subaé   | April    | 2011 | #6    | 26       | 0,63   | 2,38   |
| Subaé   | April    | 2011 | #7    | 24       | 0,22   | 1,76   |
| Subaé   | April    | 2011 | #8    | 15       | 0,22   | 1,29   |
| Subaé   | April    | 2011 | #9    | 11       | 0,2    | 0,47   |
| Subaé   | April    | 2011 | #10   | 15       | 0      | 0,43   |
| Subaé   | April    | 2011 | #11   | 11       | 0      | 0,49   |
| Subaé   | December | 2009 | #1    | 40       | 0,08   | 1,78   |
| Subaé   | December | 2009 | #2    | 40       | 12,2   | 55,18  |
| Subaé   | December | 2009 | #3    | 41,5     | 0      | 0,19   |
| Subaé   | December | 2009 | #4    | 40,5     | 0      | 0,14   |
| Subaé   | December | 2009 | #5    | 40       | 2,78   | 2,94   |
| Subaé   | December | 2009 | #6    | 37,5     | 0      | 0,01   |
| Subaé   | December | 2009 | #7    | 32       | 0,53   | 0,13   |

|           |          |      |     |       |       |       |
|-----------|----------|------|-----|-------|-------|-------|
| Subaé     | December | 2009 | #8  | 23    | 0,22  | 1,29  |
| Subaé     | December | 2009 | #9  | 21    | 0     | 0,01  |
| Subaé     | December | 2009 | #10 | 16    | 0,17  | 1,05  |
| Subaé     | December | 2009 | #11 | 25    | 0,63  | 5,57  |
| Subaé     | March    | 2006 | #1  | 37,88 | 0     | 0     |
| Subaé     | March    | 2006 | #2  | 38,12 | 22,9  | 26,91 |
| Subaé     | March    | 2006 | #3  | 39,35 | 0     | 0     |
| Subaé     | March    | 2006 | #4  | 36,98 | 0     | 0     |
| Subaé     | March    | 2006 | #5  | 37    | 0     | 0     |
| Subaé     | March    | 2006 | #6  | 35,28 | 0     | 0     |
| Subaé     | March    | 2006 | #7  | 33,45 | 5,24  | 5,4   |
| Subaé     | March    | 2006 | #8  | 25,65 | 5,45  | 6,98  |
| Subaé     | March    | 2006 | #9  | 19,34 | 3,19  | 4     |
| Subaé     | March    | 2006 | #10 | 12,08 | 9,51  | 9,47  |
| Subaé     | March    | 2006 | #11 | 4,5   | 9,85  | 9,87  |
| Subaé     | June     | 2004 | #1  | 27,52 | 0     | 0,02  |
| Subaé     | June     | 2004 | #2  | 26,14 | 21,08 | 31,86 |
| Subaé     | June     | 2004 | #3  | 24,44 | 0     | 0,04  |
| Subaé     | June     | 2004 | #4  | 23,9  | 0     | 0     |
| Subaé     | June     | 2004 | #5  | 21,25 | 0,77  | 0,38  |
| Subaé     | June     | 2004 | #6  | 15,94 | 0     | 0,01  |
| Subaé     | June     | 2004 | #7  | 9,75  | 0,2   | 1,19  |
| Subaé     | June     | 2004 | #8  | 4,98  | 0     | 0,3   |
| Subaé     | June     | 2004 | #9  | 1,87  | 0     | 0,32  |
| Subaé     | June     | 2004 | #10 | 0,49  | 0,4   | 2,83  |
| Subaé     | June     | 2004 | #11 | 0,17  | 0     | 0,96  |
| Jaguaripe | August   | 2014 | #1  | 40,9  | 0,1   | 0,38  |
| Jaguaripe | August   | 2014 | #2  | 34,2  | 3,27  | 3,75  |
| Jaguaripe | August   | 2014 | #3  | 28,6  | 0     | 0,15  |
| Jaguaripe | August   | 2014 | #4  | 27,3  | 0     | 0,17  |
| Jaguaripe | August   | 2014 | #5  | 28,7  | 0     | 0     |
| Jaguaripe | August   | 2014 | #6  | 19,9  | 0     | 0     |
| Jaguaripe | August   | 2014 | #7  | 14,4  | 0     | 2,61  |
| Jaguaripe | August   | 2014 | #8  | 1,5   | 0     | 0,88  |
| Jaguaripe | August   | 2014 | #9  | 0,24  | 6,65  | 18,04 |
| Jaguaripe | August   | 2014 | #10 | 0,1   | 0     | 0,71  |
| Jaguaripe | August   | 2010 | #1  | 28,02 | 0,07  | 0,23  |
| Jaguaripe | August   | 2010 | #2  | 23,13 | 1,29  | 1,81  |
| Jaguaripe | August   | 2010 | #3  | 18,58 | 0,06  | 0,15  |
| Jaguaripe | August   | 2010 | #4  | 15,91 | 0,02  | 0,07  |
| Jaguaripe | August   | 2010 | #5  | 15,36 | 0,02  | 0,02  |
| Jaguaripe | August   | 2010 | #6  | 10,38 | 0,01  | 0,17  |
| Jaguaripe | August   | 2010 | #7  | 7,04  | 3,54  | 1,99  |

|           |        |      |     |       |       |      |
|-----------|--------|------|-----|-------|-------|------|
| Jaguaripe | August | 2010 | #8  | 1,7   | 0,14  | 0,46 |
| Jaguaripe | August | 2010 | #9  | 0,24  | 4,19  | 8,44 |
| Jaguaripe | August | 2010 | #10 | 1,11  | 2,01  | 2,47 |
| Jaguaripe | August | 2007 | #1  | 16,7  | 0,06  | 0,25 |
| Jaguaripe | August | 2007 | #2  | 10,9  | 0,04  | 0,5  |
| Jaguaripe | August | 2007 | #3  | 4,62  | 0,06  | 0,12 |
| Jaguaripe | August | 2007 | #4  | 1,13  | 0     | 0    |
| Jaguaripe | August | 2007 | #5  | 0,53  | 0,05  | 0,02 |
| Jaguaripe | August | 2007 | #6  | 0,23  | 0,03  | 0,36 |
| Jaguaripe | August | 2007 | #7  | 0,14  | 0,79  | 2,21 |
| Jaguaripe | August | 2007 | #8  | 0,12  | 0,41  | 0,46 |
| Jaguaripe | August | 2007 | #9  | 0,12  | 0,64  | 0,95 |
| Jaguaripe | August | 2007 | #10 | 0,11  | 0,12  | 0,3  |
| Jaguaripe | May    | 2006 | #1  | 26,45 | 0,06  | 0,05 |
| Jaguaripe | May    | 2006 | #2  | 24,29 | 0,55  | 1,19 |
| Jaguaripe | May    | 2006 | #3  | 22,53 | 0,13  | 0,17 |
| Jaguaripe | May    | 2006 | #4  | 19,29 | 0,06  | 0,03 |
| Jaguaripe | May    | 2006 | #5  | 16,84 | 0     | 0,05 |
| Jaguaripe | May    | 2006 | #6  | 11,01 | 0     | 0,14 |
| Jaguaripe | May    | 2006 | #7  | 6,57  | 9,82  | 1,16 |
| Jaguaripe | May    | 2006 | #8  | 3,48  | 0     | 0,04 |
| Jaguaripe | May    | 2006 | #9  | 0,36  | 5,28  | 6,34 |
| Jaguaripe | May    | 2006 | #10 | 0,11  | 5,9   | 6,41 |
| Paraguaçu | August | 2014 | #1  | 32,77 | 0     | 0,32 |
| Paraguaçu | August | 2014 | #2  | 38,7  | 0     | 0,46 |
| Paraguaçu | August | 2014 | #3  | 30,71 | 0     | 0    |
| Paraguaçu | August | 2014 | #4  | 37    | 0     | 0,73 |
| Paraguaçu | August | 2014 | #5  | 20,85 | 0     | 0,64 |
| Paraguaçu | August | 2014 | #6  | 35,7  | 0     | 3,36 |
| Paraguaçu | August | 2014 | #7  | 12,56 | 2,02  | 4,31 |
| Paraguaçu | August | 2014 | #8  | 26,8  | 0     | 0,73 |
| Paraguaçu | August | 2014 | #9  | 6,68  | 0     | 1,95 |
| Paraguaçu | August | 2014 | #10 | 21,3  | 0     | 6,22 |
| Paraguaçu | June   | 2011 | #1  | 34    | 12,02 | 5,73 |
| Paraguaçu | June   | 2011 | #2  | 33    | 1,74  | 0,71 |
| Paraguaçu | June   | 2011 | #3  | 31    | 9,8   | 4,79 |
| Paraguaçu | June   | 2011 | #4  | 26    | 2,84  | 5,32 |
| Paraguaçu | June   | 2011 | #5  | 20    | 0,24  | 1,98 |
| Paraguaçu | June   | 2011 | #6  | 27    | 0,29  | 1,69 |
| Paraguaçu | June   | 2011 | #7  | 15    | 0,34  | 0,86 |
| Paraguaçu | June   | 2011 | #8  | 11    | 0     | 0,22 |
| Paraguaçu | June   | 2011 | #9  | 9     | 0,26  | 1,49 |
| Paraguaçu | June   | 2011 | #10 | 3     | 0,13  | 3,25 |

|           |          |      |     |       |       |      |
|-----------|----------|------|-----|-------|-------|------|
| Paraguaçu | May      | 2005 | #1  | 30,08 | 12,18 | 7,16 |
| Paraguaçu | May      | 2005 | #2  | 29,14 | 0,67  | 0,94 |
| Paraguaçu | May      | 2005 | #3  | 28,3  | 0,02  | 0,23 |
| Paraguaçu | May      | 2005 | #4  | 26,7  | 0     | 0,19 |
| Paraguaçu | May      | 2005 | #5  | 21,09 | 5,26  | 7,81 |
| Paraguaçu | May      | 2005 | #6  | 12,92 | 0,65  | 6,5  |
| Paraguaçu | May      | 2005 | #7  | 7,72  | 0     | 0,94 |
| Paraguaçu | May      | 2005 | #8  | 4,53  | 1,58  | 8,77 |
| Paraguaçu | May      | 2005 | #9  | 2,2   | 0     | 0,25 |
| Paraguaçu | May      | 2005 | #10 | 0,6   | 0     | 0,63 |
| Paraguaçu | December | 2005 | #1  | 34,22 | 0,62  | 0,45 |
| Paraguaçu | December | 2005 | #2  | 33,39 | 1,33  | 0,52 |
| Paraguaçu | December | 2005 | #3  | 32,84 | 0,04  | 0,11 |
| Paraguaçu | December | 2005 | #4  | 31,66 | 0,12  | 0    |
| Paraguaçu | December | 2005 | #5  | 28,23 | 3,71  | 7,21 |
| Paraguaçu | December | 2005 | #6  | 21,45 | 0,3   | 3,7  |
| Paraguaçu | December | 2005 | #7  | 14,96 | 0,39  | 0,5  |
| Paraguaçu | December | 2005 | #8  | 12,13 | 1,23  | 5,12 |
| Paraguaçu | December | 2005 | #9  | 8,94  | 0     | 0,13 |
| Paraguaçu | December | 2005 | #10 | 7,78  | 0,15  | 0,81 |

| Very coarse sand | Coarse sand | Medium sand | Fine sand | Very fine sand | Silt and clay |
|------------------|-------------|-------------|-----------|----------------|---------------|
| 0,12             | 0,65        | 1,28        | 4,51      | 21,09          | 71,9          |
| 0,46             | 0,45        | 1,85        | 2,28      | 5,59           | 89,24         |
| 0,17             | 0,26        | 3,21        | 5,6       | 5,72           | 84,61         |
| 0,57             | 1,15        | 2,43        | 4,93      | 14,02          | 76,9          |
| 5,27             | 8,68        | 6,68        | 17,88     | 8,43           | 48,38         |
| 0,57             | 1,2         | 2,25        | 60,62     | 21,66          | 13,24         |
| 20,88            | 53,91       | 21,42       | 0,27      | 0              | 0             |
| 4,83             | 36,46       | 54,26       | 3,68      | 0              | 0,1           |
| 1,13             | 24,7        | 65,08       | 8,26      | 0,13           | 0,71          |
| 0,49             | 1,39        | 3,29        | 25,52     | 22,68          | 46,34         |
| 13,97            | 23,09       | 8,95        | 3,26      | 3,49           | 43,09         |
| 0,19             | 3,47        | 10,23       | 15,72     | 60,5           | 9,88          |
| 1,8              | 8,61        | 13,07       | 24,68     | 43,18          | 8,45          |
| 1,97             | 8,17        | 14,55       | 33,56     | 35,62          | 6,13          |
| 0,2              | 0,75        | 2,72        | 48,74     | 42,28          | 5,29          |
| 5,87             | 15,12       | 26,32       | 30,18     | 10,13          | 8,32          |
| 9,17             | 45,1        | 37,87       | 4,52      | 0,28           | 0,05          |
| 7,28             | 12,82       | 48,53       | 28,77     | 0,47           | 0,15          |
| 10,68            | 37,01       | 45,79       | 4,85      | 0,1            | 0,06          |

|       |       |       |       |       |       |
|-------|-------|-------|-------|-------|-------|
| 3,3   | 21,54 | 62,5  | 11,68 | 0,2   | 0,11  |
| 6,01  | 34,2  | 52,89 | 5,72  | 0,48  | 0,28  |
| 5,44  | 38,73 | 46,14 | 8,99  | 0,17  | 0,04  |
| 6,81  | 16,4  | 14,9  | 19,8  | 28,5  | 11,73 |
| 21,44 | 3,97  | 1,91  | 1,69  | 3,06  | 0,55  |
| 0,18  | 9,31  | 23,78 | 20,52 | 25,34 | 20,68 |
| 0,64  | 3,21  | 9,27  | 38,29 | 20,33 | 28,12 |
| 5,73  | 9,88  | 18,65 | 49,07 | 9,61  | 1,34  |
| 0,01  | 1,24  | 27,82 | 68,34 | 2,37  | 0,2   |
| 0,92  | 11,17 | 35,02 | 46,52 | 5,38  | 0,33  |
| 10,68 | 37,01 | 45,79 | 4,85  | 0,1   | 0,06  |
| 0,28  | 13,28 | 73,94 | 12,17 | 0,2   | 0,11  |
| 11,03 | 45,52 | 35,56 | 6,26  | 0,25  | 0,15  |
| 21,14 | 46,35 | 26,14 | 0,16  | 0     | 0     |
| 0     | 0,02  | 0,22  | 0,39  | 23,81 | 75,56 |
| 10,55 | 10,41 | 7,34  | 4,11  | 4,82  | 12,97 |
| 0     | 0,02  | 0,09  | 0,26  | 2,12  | 97,51 |
| 12,07 | 12,09 | 0,18  | 8,21  | 11,8  | 55,65 |
| 0     | 18,11 | 0,87  | 4,17  | 5,85  | 70,99 |
| 0     | 5,65  | 0,59  | 64,88 | 9,15  | 19,73 |
| 13,44 | 25,88 | 40,26 | 9,23  | 0,38  | 0,17  |
| 20,38 | 46,92 | 17,85 | 1,14  | 0,08  | 1,2   |
| 13,69 | 60,23 | 16,98 | 0,5   | 0,14  | 1,26  |
| 18,93 | 9,71  | 0,51  | 5,94  | 15,06 | 30,87 |
| 21,47 | 31,08 | 17,33 | 4,57  | 2,01  | 3,81  |
| 0     | 0,36  | 0,72  | 2,47  | 22,63 | 73,8  |
| 11,18 | 6,07  | 3,35  | 4,63  | 7,39  | 14,45 |
| 0,18  | 0,16  | 0,04  | 0,29  | 0,98  | 98,3  |
| 0,67  | 0,55  | 0,49  | 4,47  | 2,14  | 91,67 |
| 1,41  | 1,08  | 6,25  | 58,57 | 16,95 | 14,59 |
| 0,03  | 0,54  | 51,85 | 44,98 | 1,24  | 1,35  |
| 4,9   | 24,92 | 50,82 | 16,34 | 0,08  | 1,54  |
| 1,54  | 19,7  | 51,35 | 25,37 | 0,62  | 1,13  |
| 1,66  | 23,67 | 66,6  | 5,69  | 0,32  | 1,74  |
| 16,82 | 42,07 | 29,73 | 2,55  | 0,67  | 4,93  |
| 5,55  | 42,62 | 44,86 | 5,46  | 0,1   | 0,45  |
| 1,91  | 4,17  | 40,47 | 28,89 | 15,48 | 8,59  |
| 4,99  | 8,4   | 34    | 37,03 | 3,92  | 4,64  |
| 0,53  | 5,24  | 21,54 | 54,31 | 12,81 | 5,42  |
| 1,55  | 4,64  | 26,64 | 54,66 | 6,32  | 6,03  |
| 0,04  | 0,36  | 13,9  | 83,32 | 1,65  | 0,74  |
| 0,39  | 15,41 | 70,63 | 13,36 | 0,11  | 0,1   |
| 6,46  | 24,01 | 33,24 | 27,47 | 4,21  | 2     |

|       |       |       |       |       |       |
|-------|-------|-------|-------|-------|-------|
| 1,35  | 12,22 | 26,46 | 48    | 7,88  | 3,21  |
| 29,66 | 25,55 | 15,6  | 2,65  | 0,35  | 1,51  |
| 3,29  | 58,88 | 32    | 3,61  | 0,36  | 1,15  |
| 1,16  | 4,49  | 57,04 | 25,63 | 8,35  | 3,02  |
| 2,73  | 6,12  | 37,34 | 43,56 | 4,81  | 2,34  |
| 0,33  | 4,61  | 16,37 | 57,19 | 16,57 | 4,71  |
| 0,63  | 2,12  | 11,17 | 74,44 | 8,15  | 3,4   |
| 0,06  | 0,66  | 13,97 | 79,12 | 5,06  | 1,09  |
| 1,16  | 11,48 | 51,44 | 32,44 | 2,45  | 0,84  |
| 6,41  | 16,72 | 30,83 | 34,75 | 3,5   | 0,92  |
| 1,46  | 12,45 | 28,42 | 45,97 | 8,89  | 2,21  |
| 16,49 | 38,85 | 31,38 | 8,55  | 4,28  | 0,78  |
| 6,47  | 42,77 | 32,71 | 8,05  | 4,54  | 0,96  |
| 1,18  | 5,8   | 65,82 | 23,2  | 3,64  | 0,06  |
| 1,44  | 4,6   | 38,58 | 45,52 | 7,43  | 1,9   |
| 0,27  | 7,95  | 18,64 | 56,67 | 15,16 | 1,12  |
| 0,01  | 0,99  | 4,01  | 89,04 | 5,88  | 0,06  |
| 0,02  | 1,17  | 14,34 | 80,73 | 3,64  | 0,04  |
| 1,84  | 9,85  | 34,32 | 50,84 | 2,71  | 0,06  |
| 6,4   | 15,22 | 30,78 | 40,78 | 3,58  | 0,24  |
| 2,49  | 16,67 | 31,18 | 40,76 | 7     | 1,03  |
| 4,01  | 27,14 | 54,4  | 10,47 | 1,98  | 0,42  |
| 2,06  | 40,38 | 43,44 | 9,43  | 2,93  | 1,35  |
| 0,38  | 3,51  | 64,83 | 24,82 | 5,94  | 0,4   |
| 1,76  | 5,36  | 39,45 | 48,13 | 3,07  | 0,49  |
| 0,2   | 0,63  | 8,93  | 60,6  | 21,75 | 7,59  |
| 0,32  | 0,72  | 2,86  | 79,63 | 12,26 | 4,12  |
| 0,11  | 0,46  | 13,67 | 73,32 | 9,9   | 2,48  |
| 1,27  | 9,19  | 49,38 | 33,13 | 4,52  | 2,37  |
| 6,36  | 14,94 | 28,47 | 35,99 | 2,72  | 0,53  |
| 0,53  | 8,45  | 27,64 | 49,16 | 11,79 | 2,39  |
| 15,8  | 25,01 | 24,13 | 12,52 | 10,51 | 0,41  |
| 14,08 | 29,05 | 22,7  | 11,11 | 10,34 | 0,4   |
| 1,13  | 2,96  | 5,54  | 12,91 | 5,49  | 71,66 |
| 1,1   | 2,05  | 18,72 | 53,7  | 3,92  | 20,04 |
| 0     | 0,02  | 26,86 | 72,26 | 0,55  | 0,3   |
| 2,85  | 4,99  | 6,74  | 3,61  | 1,88  | 79,21 |
| 1,81  | 26    | 12,54 | 25,8  | 12,93 | 20,29 |
| 9,45  | 31,17 | 25,98 | 13,04 | 2,1   | 14,9  |
| 18,8  | 40,61 | 17,27 | 6,13  | 0,59  | 10,26 |
| 7,32  | 63,99 | 27,22 | 0,68  | 0     | 0,08  |
| 13,02 | 53,75 | 29,55 | 1,59  | 0     | 0,13  |
| 32,56 | 47,48 | 11,08 | 2,53  | 0,07  | 0,08  |

|       |       |       |       |      |       |
|-------|-------|-------|-------|------|-------|
| 10,08 | 21    | 39,78 | 4,21  | 0,77 | 6,41  |
| 1,01  | 5,21  | 20,34 | 55,49 | 4,1  | 11,41 |
| 3,56  | 5,79  | 21,06 | 43,21 | 2,25 | 9,55  |
| 16,79 | 31,67 | 24,75 | 2,65  | 0,13 | 15,86 |
| 6,47  | 18,2  | 18,55 | 36,03 | 8,88 | 9,65  |
| 4,58  | 12,81 | 23,3  | 40,84 | 5,4  | 11,09 |
| 5,19  | 35,06 | 35,73 | 9,19  | 1,32 | 12,3  |
| 6,23  | 60,36 | 31,91 | 1,27  | 0    | 0     |
| 11,63 | 43,51 | 39,16 | 3,83  | 0,06 | 0,07  |
| 19,97 | 50,5  | 24,57 | 1,34  | 0    | 0,24  |
| 3,84  | 9,99  | 17,48 | 4,77  | 0,98 | 43,61 |
| 0,65  | 6,25  | 13,4  | 40,99 | 6,84 | 30,26 |
| 0,54  | 3,41  | 43,65 | 29,27 | 1,08 | 21,81 |
| 0,3   | 0,84  | 1,89  | 3,65  | 1,16 | 91,98 |
| 4,74  | 14,34 | 25,78 | 28,24 | 1,53 | 12,31 |
| 12,81 | 28,81 | 16,65 | 22,17 | 3,33 | 9,09  |
| 3,41  | 39,8  | 34,87 | 11,55 | 1,82 | 7,62  |
| 20,22 | 49,59 | 17,35 | 2,02  | 0,07 | 0,39  |
| 3,43  | 50,97 | 40,55 | 4,54  | 0,12 | 0,15  |
| 6,08  | 43,41 | 43,93 | 5,32  | 0,24 | 0,38  |
| 0,66  | 1,73  | 4,68  | 1,03  | 0,24 | 90,58 |
| 0,65  | 6,42  | 17,15 | 42,26 | 5    | 26,66 |
| 0,46  | 2,88  | 48,23 | 24,63 | 1,14 | 22,51 |
| 0,33  | 0,82  | 2,18  | 3,63  | 1,24 | 91,69 |
| 5,32  | 12,18 | 27,93 | 30,41 | 1,4  | 11,84 |
| 14,12 | 26,14 | 20,24 | 22,32 | 3,38 | 9,79  |
| 3,77  | 34,46 | 40,27 | 10,62 | 1,9  | 8,1   |
| 23,31 | 45,88 | 22,1  | 1,82  | 0,1  | 0,44  |
| 4,9   | 44,56 | 44,24 | 3,69  | 0,13 | 2,35  |
| 8,1   | 39,7  | 45,79 | 4,62  | 0,3  | 0,51  |
