# Supplementary material for: Drivers of benthic metacommunity structure along tropical estuaries
Source: PubMed Central journal article supplement (PMC6997391; doi:10.1038/s41598-020-58631-1), 2020-02-03
Supplement: 41598_2020_58631_MOESM4_ESM.pdf [file 41598_2020_58631_MOESM4_ESM.pdf]

## Drivers of benthic metacommunity structure along tropical estuaries

Andreia Teixeira Alves<sup>1\*</sup>, Danielle Katharine Petsch<sup>2</sup>, Francisco Barros<sup>1</sup>

\*Corresponding author e-mail address: [dea\\_alves106@yahoo.com.br](mailto:dea_alves106@yahoo.com.br) ; Telephone: +55 71991542200 1.

1. Laboratório de Ecologia Bentônica (LEB), Instituto de Biologia, Programa de Pós Graduação em Ecologia e Biomonitoramento, Universidade Federal da Bahia, Brazil

2. Núcleo de Pesquisas em Limnologia, Ictiologia e Aquicultura (Nupelia), Programa de Pós- Graduação em Ecologia de Ambientes Aquáticos Continentais (PEA), Universidade Estadual de Maringá, Brazil

### Supplementary Dataset Spatial Coordinates

| Estuary   | Sites | Latitude      | Longitude     |
|-----------|-------|---------------|---------------|
| Subaé     | #1    | 12°40'4.62°S  | 38°39'39.67°O |
| Subaé     | #2    | 12°39'0.03°S  | 38°39'39.72°O |
| Subaé     | #3    | 12°38'27.76°S | 38°39'56.40°O |
| Subaé     | #4    | 12°38'11.66°S | 38°40'29.51°O |
| Subaé     | #5    | 12°37'55.65°S | 38°41'2.68°O  |
| Subaé     | #6    | 12°37'24.70°S | 38°42'5.76°O  |
| Subaé     | #7    | 12°36'14.44°S | 38°42'3.16°O  |
| Subaé     | #8    | 12°35'19.30°S | 38°41'43.84°O |
| Subaé     | #9    | 12°34'18.48°S | 38°41'31.35°O |
| Subaé     | #10   | 12°33'50.58°S | 38°41'31.31°O |
| Subaé     | #11   | 12°33'55.86°S | 38°41'39.03°O |
| Jaguaripe | #1    | 13°7'13.67°S  | 38°50'23.38°O |
| Jaguaripe | #2    | 13°6'45.91°S  | 38°51'38.09°O |
| Jaguaripe | #3    | 13°6'31.61°S  | 38°53'14.94°O |
| Jaguaripe | #4    | 13°6'31.61°S  | 38°54'55.88°O |
| Jaguaripe | #5    | 13°6'5.26°S   | 38°56'6.82°O  |
| Jaguaripe | #6    | 13°5'21.37°S  | 38°57'24.88°O |
| Jaguaripe | #7    | 13°4'4.34°S   | 38°57'31.30°O |
| Jaguaripe | #8    | 13°2'59.46°S  | 38°57'13.08°O |
| Jaguaripe | #9    | 13°2'3.64°S   | 38°58'47.82°O |
| Jaguaripe | #10   | 13°2'1.99°S   | 38°59'49.34°O |
| Paraguaçu | #1    | 12°50'3.32°S  | 38°47'22.40°O |
| Paraguaçu | #2    | 12°51'3.59°S  | 38°49'59.61°O |
| Paraguaçu | #3    | 12°49'22.01°S | 38°51'40.00°O |
| Paraguaçu | #4    | 12°47'24.99°S | 38°51'50.01°O |
| Paraguaçu | #5    | 12°45'30.61°S | 38°52'26.39°O |
| Paraguaçu | #6    | 12°44'8.88°S  | 38°53'3.47°O  |
| Paraguaçu | #7    | 12°43'46.58°S | 38°54'11.53°O |
| Paraguaçu | #8    | 12°43'48.70°S | 38°54'47.15°O |

|           |     |               |               |
|-----------|-----|---------------|---------------|
| Paraguaçu | #9  | 12°43'52.69°S | 38°55'19.91°O |
| Paraguaçu | #10 | 12°42'38.51°S | 38°56'8.15°O  |
